1 **Title: Axonal CB1 receptors mediate inhibitory**  
2 **bouton formation via cAMP increase**

3

4 **Authors:** Jian Liang<sup>1</sup>, Dennis LH Kruijssen<sup>1,2</sup>, Aniek CJ Verschuuren<sup>1</sup>, Bas JB Voesenek<sup>1</sup>,  
5 Feline Benavides<sup>1</sup>, Maria Sáez Gonzalez<sup>1</sup>, Marvin Ruiten<sup>1</sup>, Corette J Wierenga<sup>1</sup>

6

7 **Affiliation:** <sup>1</sup> Cell Biology, Department of Biology, Faculty of Science, Utrecht University,  
8 3584 CH Utrecht, the Netherlands

9 <sup>2</sup> current address: College of Life Sciences, Faculty of Science, University of Amsterdam,  
10 1098 XH, Amsterdam, The Netherlands

11

12 **Corresponding author:**

13 Corette J. Wierenga  
14 Utrecht University  
15 Department of Biology, Faculty of Science  
16 Padualaan 8, 3584CH Utrecht  
17 The Netherlands  
18 E-mail: c.j.wierenga@uu.nl  
19 Tel. +31-30-253 2659

20

21 **Acknowledgements:**

22 This work was supported by a CSC scholarship (JL) and by the Netherlands Organisation  
23 for Scientific Research, as part of the research program of the Foundation for  
24 Fundamental Research on Matter (FOM) (DLHK; #15PR3178). We thank Lotte Herstel  
25 for helping with experiments in Fig. 1E-F and René van Dorland for excellent technical  
26 support.

27

28 **Author contributions:**

29 JL, DLHK, CJW designed the experiments. JL, DLHK, MR, BJBV, ACJV, FB performed the  
30 experiments. JL, BJBV, ACJV, FB, MSG, MR analyzed the data. CJW wrote the  
31 manuscript with input from all other authors.

32

33 **Conflict of interest:**

34 The authors declare no competing financial interests.

35

36

## 37 **Abstract**

38 Experience-dependent formation and removal of synapses are essential throughout  
39 life. For instance, GABAergic synapses are removed to facilitate learning, and strong  
40 excitatory activity is accompanied by formation of inhibitory synapses. We recently  
41 discovered that active dendrites trigger the growth of inhibitory synapses via CB1  
42 receptor-mediated endocannabinoid signaling, but the underlying mechanism  
43 remained unclear. Using two-photon microscopy to monitor the formation of  
44 individual inhibitory boutons, we found that CB1 receptor activation mediated  
45 formation of inhibitory boutons and promoted their subsequent stabilization.  
46 Inhibitory bouton formation did not require neuronal activity and was independent of  
47  $G_{i/o}$  protein signaling, but was directly induced by elevating cAMP levels using forskolin  
48 and by activating  $G_s$  proteins using DREADDs. Our findings reveal that axonal CB1  
49 receptors signal via unconventional downstream pathways and that inhibitory bouton  
50 formation is triggered by an increase in axonal cAMP levels. Our results demonstrate  
51 a novel role for axonal CB1 receptors in axon-specific, and context-dependent,  
52 inhibitory synapse formation.

53 – 155 words

54

55

56

57

58

## 59 Introduction

60 Synaptic plasticity, the strengthening and weakening of existing synapses, is often  
61 considered the physiological basis for learning and adaptation. In addition, the  
62 experience-dependent formation and removal of synapses is equally important (Bailey  
63 and Kandel, 1993; Caroni et al., 2012). Changes in the number of synaptic connections  
64 have been shown to be critical during learning *in vivo* (Bailey and Chen, 1989; Caroni  
65 et al., 2012; Hofer et al., 2009; Kozorovitskiy et al., 2012; Ruediger et al., 2011) and  
66 strongly determine postsynaptic function (Scholl et al., 2020). Plasticity of GABAergic  
67 synapses is particularly important for shaping and controlling brain activity throughout  
68 life (Chiu et al., 2019; Flores and Méndez, 2014; Herstel and Wierenga, 2021; Maffei et  
69 al., 2017) and GABAergic dysfunction is associated with multiple brain disorders,  
70 including schizophrenia and autism (Lewis et al., 2005; Mullins et al., 2016; Tang et al.,  
71 2021). For example, the number of inhibitory synapses is rapidly adjusted during  
72 learning (Bourne and Harris, 2011; Chen et al., 2015; Donato et al., 2015, 2013) or  
73 when sensory input is lost (Keck et al., 2011) to facilitate plasticity at nearby excitatory  
74 synapses. Vice versa, potentiation of excitatory synapses can trigger the formation of  
75 inhibitory synapses to maintain a local balance (Bourne and Harris, 2011; Hu et al.,  
76 2019; Knott et al., 2002). The formation, stabilization and removal of synapses likely  
77 requires local context-dependent signaling mechanisms (Hu et al., 2019; Kirchner and  
78 Gjorgjieva, 2019; Kleindienst et al., 2011; Niculescu et al., 2018; Nishiyama and Yasuda,  
79 2015; Oh et al., 2016), but our current understanding of these processes, especially at  
80 inhibitory synapses, is far from complete.

81

82 We recently discovered that strong, clustered activation of excitatory synapses along  
83 dendrites of hippocampal CA1 pyramidal neurons can trigger the formation of a new  
84 inhibitory bouton onto the activated dendrite (Hu et al., 2019). We proposed that this  
85 dendritic mechanism serves to maintain local balance between excitatory and  
86 inhibitory inputs during ongoing synaptic plasticity. Inhibitory bouton formation  
87 required dendritic endocannabinoid synthesis and activation of CB1 receptors (Hu et  
88 al., 2019). Dendritic endocannabinoids are well-known to serve as retrograde signals  
89 to regulate synaptic plasticity (Alger, 2002; Castillo et al., 2012; Chevaleyre and Castillo,  
90 2003; Kano et al., 2009; Katona and Freund, 2012), but it is unclear how CB1 receptors  
91 can trigger new inhibitory bouton formation.

92

93 CB1 receptors are G-protein coupled receptors and are widely abundant in the brain.  
94 They are expressed in both excitatory and inhibitory neurons, as well as in glia cells  
95 (Bonilla - Del Río et al., 2021; Hebert-Chatelain et al., 2016; Maroso et al., 2016;  
96 Navarrete et al., 2014). Perhaps the most prominent CB1 expression is in a subset of

97 inhibitory axons in the dendritic layer of the hippocampal CA1 area (Bonilla-Del Río et  
98 al., 2021; Dudok et al., 2015). Axonal CB1 signaling plays an important role during axon  
99 guidance (Argaw et al., 2011; Berghuis et al., 2007; Njoo et al., 2015; Roland et al.,  
100 2014), but axonal CB1 receptor expression remains high during adulthood. The best  
101 described actions of CB1 receptors in adulthood is to suppress neurotransmitter  
102 release (Alger, 2002; Castillo et al., 2012; Kano et al., 2009). However, CB1 receptors  
103 are not enriched in boutons, but freely diffuse within the entire axonal membrane  
104 (Dudok et al., 2015). It is possible that axonal CB1 receptors may function as  
105 replacement pool for internalized synaptic receptors at boutons as recently suggested  
106 for opioid receptors (Jullié et al., 2020), although synaptic enrichment would still be  
107 expected. In addition, GABA release at dendritic inhibitory synapses is not strongly  
108 modulated by CB1 receptors (Lee et al., 2015, 2010), and coupling between CB1  
109 receptors and the active zone is weak (Dudok et al., 2015). This suggests that CB1  
110 receptors in inhibitory axons serve an additional purpose. Interestingly, it was recently  
111 described that CB1 receptors can also mediate synaptic potentiation (Cui et al., 2016;  
112 Monday and Castillo, 2017; Wang et al., 2017). Although CB1 receptors typically signal  
113 via  $G_{i/o}$ -proteins, many additional downstream pathways, both dependent and  
114 independent of G-proteins, have been described (Berghuis et al., 2007; Cui et al., 2016;  
115 Flores-Otero et al., 2014; Glass and Felder, 1997; Roland et al., 2014; Zhou et al., 2019).  
116  
117 Here, we demonstrate that activation of axonal CB1 receptors can trigger the initial  
118 formation of inhibitory synapses. Using two-photon time lapse imaging we observed  
119 the formation of inhibitory boutons upon brief application of the CB1 receptor agonist  
120 WIN. We demonstrate that this requires the presence of CB1 receptors on inhibitory  
121 axons. Furthermore, we found that CB1-mediated inhibitory bouton formation is  
122 independent of  $G_{i/o}$  protein signaling and neuronal activity. We find that new inhibitory  
123 boutons are formed in response to elevated cAMP levels or activation of  $G_s$  protein  
124 signaling in inhibitory axons. Our data indicate that activation of axonal CB1 receptors  
125 triggers inhibitory synapse formation via an atypical signaling pathway via  $G_s$ -proteins.  
126 Furthermore, our data identify an increase in axonal cAMP as a crucial second  
127 messenger for mediating inhibitory bouton formation.

## 128 Results

### 129 Repeated CB1 receptor activation increases functional presynaptic terminals

130 We previously demonstrated that new inhibitory boutons can form in response to brief  
131 CB1 receptor activation (Hu et al., 2019). Newly formed boutons often did not persist  
132 (Hu et al., 2019), suggesting that additional or repeated signaling is required to  
133 eventually form functional inhibitory synapses (Frias et al., 2019; Wierenga, 2017). It  
134 was recently reported that strong, but brief, CB1 receptor activation can induce

135 synaptic potentiation, while longer CB1 activation induces synaptic depression (Cui et  
136 al., 2016, 2015). This suggests that CB1 activation pattern is an important factor in  
137 determining its downstream signaling. We therefore sought to employ repeated, short  
138 activation of CB1 receptors in order to induce the formation of inhibitory synapses. We  
139 activated CB1 receptors in hippocampal slice cultures by repeated short exposure to  
140 the CB1 receptor ligand 2-AG (100  $\mu$ M; 3 times 20 minutes with 2 hours interval) (Fig.  
141 1A). We recorded miniature inhibitory postsynaptic currents (mIPSCs) in CA1  
142 pyramidal neurons to assess functional inhibitory synapses 24 hours after the start of  
143 the first 2-AG exposure (Fig. 1B). Repeated CB1 receptor activation resulted in an  
144 increase of the mean mIPSC frequency by 38% (control:  $3.9 \pm 0.3$  Hz; 2-AG:  $5.5 \pm 0.4$   
145 Hz,  $p=0.013$ ; Fig 1C), while mIPSC amplitudes were not affected (Fig. 1D). Continuous  
146 exposure to 2-AG for 24 hours did not alter frequency or amplitude of spontaneous  
147 IPSCs (Fig. 1E,F), consistent with the notion that activation pattern determines CB1  
148 downstream signaling. Interestingly, mIPSCs after repeated 2-AG exposure appeared  
149 to have longer rise times (Fig. 1G), while decay times were not different (Fig. 1H). We  
150 separated mIPSCs with slow and fast rise times based on a double Gaussian fit of the  
151 distribution of rise times (Fig. 1I). When we then analyzed the interevent intervals of  
152 fast and slow mIPSCs separately, we observed that the interevent intervals of slow  
153 mIPSCs were decreased after repeated CB1 activation, while the interevent intervals  
154 of fast mIPSCs were not affected (Fig. 1J,K). This analysis revealed that the observed  
155 increase in mIPSC frequency was due to a specific increase in the frequency of slow  
156 mIPSCs with long rise times (Fig. 1L). The rise time of mIPSCs depends on synaptic  
157 maturation (Gonzalez-Burgos et al., 2015; Lazarus and Josh Huang, 2011; Pardo et al.,  
158 2018), but is also strongly influenced by subcellular location, as dendritic filtering  
159 attenuates mIPSCs originating from dendritic inhibitory synapses (Bekkers and  
160 Clements, 1999; Rall, 1967; Wierenga and Wadman, 1999). This suggests that the  
161 increased mIPSC frequency after CB1 receptor activation may reflect an increase of  
162 inhibitory currents from dendritic locations, or from immature synapses.

163 To determine if the observed increase in mIPSCs was associated with an increase in  
164 the number of inhibitory synapses, we analyzed presynaptic VGAT and postsynaptic  
165 gephyrin puncta in the dendritic region of the CA1 area in parallel  
166 immunohistochemistry experiments (Fig. 2A). We observed that the density of VGAT  
167 puncta was slightly increased after repeated 2-AG application (Fig. 2B), while the VGAT  
168 puncta size was decreased (Fig. 2C). Gephyrin puncta density and size were not  
169 affected by repeated 2-AG exposure (Fig. 2D,E), and the density of inhibitory synapses,  
170 defined as VGAT-gephyrin associations, was also not different from control slices (Fig.  
171 2F,G). We therefore made a distinction between VGAT puncta that were associated  
172 with gephyrin and VGAT puncta without gephyrin (Fig. 2A, last panel). We observed  
173 that the increase in VGAT density was due to a specific increase in VGAT puncta that  
174 were not associated with gephyrin (Fig. 2H). In contrast, the reduction in VGAT puncta  
175 size was mostly due to a reduction in size of VGAT puncta with gephyrin association  
176 (Fig. 2I). This suggests that repeated short activation of CB1 receptors has two

177 separable effect on inhibitory synapses: on the one hand it leads to shrinkage of VGAT  
178 clusters at inhibitory synapses, possibly reflecting synaptic depression (Monday et al.,  
179 2020), while at the same time new VGAT clusters are formed which are not associated  
180 with the postsynaptic scaffold gephyrin. Live imaging experiments have shown that  
181 VGAT is rapidly recruited when new boutons are formed in inhibitory axons, and that  
182 gephyrin normally follows within a few hours (Dobie and Craig, 2011; Frias et al., 2019;  
183 Wierenga et al., 2008). Our data suggest that repeated CB1 receptor activation induces  
184 the formation of presynaptic VGAT clusters, likely reflecting immature inhibitory  
185 synapses.

### 186 **Acute activation of CB1 receptors affects non-persistent boutons density only slightly**

187 To get further insight in the role of CB1 receptors in the formation of inhibitory  
188 synapses, we performed two-photon live imaging in organotypic hippocampal slices to  
189 monitor GFP-labeled inhibitory bouton dynamics in response to short activation of CB1  
190 receptors. Here we used short applications (5 minutes) of CB1 receptor agonists to  
191 mimic retrograde endocannabinoid signaling (Hu et al., 2019), but we wanted to avoid  
192 inducing synaptic weakening (Monday et al., 2020). We used the endogenous CB1  
193 receptor ligand 2-AG as well as the chemically synthesized agonist WIN552121-2 (WIN),  
194 which is widely used because of its high affinity and stability (Chevalleyre et al., 2007;  
195 Roland et al., 2014; Wang et al., 2017). We verified that brief WIN application only  
196 transiently and mildly suppressed inhibitory currents (data not shown). As previously  
197 reported (Frias et al., 2019), the majority of inhibitory boutons were present at all  
198 timepoints during the 140 minutes imaging period (persistent boutons), but a  
199 substantial fraction of inhibitory boutons appeared, disappeared, or reappeared,  
200 during the imaging period (Fig 3A) (Frias et al., 2019; Schuemann et al., 2013). We will  
201 refer to the latter as non-persistent (NP) boutons. Bath application of 100  $\mu$ M 2-AG (5  
202 minutes) did not affect overall bouton density (control:  $30.8 \pm 1.7$  boutons per 100  $\mu$ m;  
203 2-AG:  $29.8 \pm 1.7$  boutons per 100  $\mu$ m,  $p=0.81$ ). The density of NP boutons appeared  
204 slightly increased after 2-AG compared to DMSO control (Fig. 3B,C), but this was mainly  
205 due to a large effect in a single axon. We calculated for each axon the average fraction  
206 of NP boutons that are present over time (NP presence). In control slices there was a  
207 small decrease in NP presence over time, possibly reflecting a decrease in network  
208 activity level when the slices are transferred from the incubator to the microscope.  
209 After 2-AG application NP presence appeared slightly more stable (Fig. 3D), but this  
210 difference did not reach statistical significance. We assessed if this difference could be  
211 traced back to a more specific effect in a particular subgroup of NP boutons (see  
212 methods and (Frias et al., 2019)), but we could not detect any differences in the  
213 densities of NP bouton subgroups in slices treated with control DMSO or 2-AG (Fig. 3E).  
214 There was also no difference in bouton duration (data not shown).  
215 The endocannabinoid 2-AG is rather unstable in solution and gets rapidly degraded in  
216 biological tissue (Dócs et al., 2017; Savinainen et al., 2012). To exclude the possibility  
217 that 2-AG gets degraded before it can activate CB1 receptors, we repeated these

218 experiments using 20  $\mu$ M WIN. Short activation (5 minutes) of CB1 receptors by bath  
219 application of WIN slightly increased in NP bouton density (Fig. 3F,G). Although the  
220 increase appeared more robust compared to the 2-AG-induced effect, the effect was  
221 too small to reach statistical significance. Similar to 2-AG, the average NP presence  
222 appeared slightly increased (Fig. 3H), but we could not detect any changes in specific  
223 NP boutons subgroups (Fig. 3I). Together these observations indicate that short CB1  
224 receptor activation by 2-AG or WIN leads to only a small (if any) increase in NP bouton  
225 density in GFP-labeled inhibitory axons.

226 Endocannabinoids are produced on demand in postsynaptic neurons (Alger and Kim,  
227 2011; Hashimoto et al., 2013; Piomelli, 2014), but an ambient level of  
228 endocannabinoids is always present, even in slices (Lee et al., 2015; Lenkey et al., 2015;  
229 Szabó et al., 2014). Tonic CB1 receptor activation by endocannabinoids affects mostly  
230 perisomatic inhibitory synapses, while dendritic inhibitory synapses are reported to be  
231 less sensitive (Lee et al., 2015, 2010). To address if tonic activation of CB1 receptors  
232 could have obscured the effects of CB1 receptor activation on inhibitory bouton  
233 dynamics in our GFP-labeled axons (which mostly target dendrites (Wierenga et al.,  
234 2010)), we applied 5  $\mu$ M AM251, an antagonist of CB1 receptors. However, AM251 had  
235 no effect on NP bouton density (Fig. 3J,K), NP presence or NP bouton subgroups (Fig.  
236 3L,M).

237 Together our experimental findings indicate that inhibitory bouton dynamics of the  
238 GFP-labeled axons are not under strong tonic endocannabinoid control and that short  
239 CB1 receptor activation by 2-AG or WIN only slightly increases NP inhibitory bouton  
240 density.

### 241 **CB1 receptors regulate inhibitory bouton dynamics specifically in CB1R+ axons**

242 The expression of CB1 receptors largely overlaps with the expression pattern of CCK in  
243 GABAergic interneurons (Katona et al., 2006, 1999). These interneurons are partially  
244 labeled in the GAD65-GFP mice which we use for our experiments (Wierenga et al.,  
245 2010). We previously estimated that ~50% of the GFP-labeled inhibitory axons express  
246 CB1 receptors in our slices (Hu et al., 2019), and this may significantly dilute an effect  
247 of CB1 receptor activation on bouton dynamics (Fig. 3). We therefore used *post-hoc*  
248 immunostaining immediately after two-photon live imaging to distinguish between  
249 axons with and without CB1 receptors (CB1R+ and CB1R- axons respectively; Fig. 4A,  
250 B). In accordance with previous reports (Dudok et al., 2015; Mikasova et al., 2008), CB1  
251 receptors covered the entire surface of CB1R+ inhibitory axons and individual CB1R+  
252 axons could be easily traced from the CB1 immunostainings (Fig. 4A, B). In addition,  
253 there was significant CB1 background staining, presumably reflecting CB1 receptors in  
254 pyramidal cells and glia cells (Bonilla-Del Río et al., 2021). CB1R- axons had a higher  
255 bouton density and higher bouton turnover compared to CB1R+ axons (Fig. 4C; see  
256 below), supporting the notion that CB1R+ and CB1R- GFP-labeled axons belong to  
257 separate subtypes of GABAergic cells.

258

259 We repeated the WIN application experiments, but now separately analyzed CB1R+  
260 and CB1R- axons. In CB1R+ axons the density of NP boutons significantly increased  
261 after WIN application (Fig. 5A,B). WIN also increased average NP presence compared  
262 to control axons (Fig. 5C). When we analyzed the NP bouton subgroups we found a  
263 specific increase in the density of new and stabilizing boutons (Fig. 5D,F), whereas  
264 other NP subgroups were unaffected (Fig. 5D-H). New boutons reflect immature  
265 synapses, which start to recruit pre- and postsynaptic proteins, while levels of VGAT  
266 and gephyrin at stabilizing boutons at the end of the imaging period is comparable to  
267 persistent boutons (Frias et al., 2019; Schuemann et al., 2013). In clear contrast, WIN  
268 had no effect on bouton density or dynamics in CB1R- axons in the same slices (Fig. 5I-  
269 P). These results indicate that axonal CB1 receptors are required for mediating the  
270 WIN-induced changes in bouton dynamics in inhibitory axons, and exclude a role for  
271 CB1 receptors on other cells. Our results indicate that short activation of axonal CB1  
272 receptors leads to an increase in NP bouton density by specifically promoting the  
273 formation and stabilization of inhibitory boutons.  
274

#### 275 **WIN-induced bouton formation does not require $G_{i/o}$ signaling and neuronal activity**

276 CB1 receptors are G-protein coupled receptors. Endocannabinoid signaling via CB1  
277 receptors typically activates  $G_{i/o}$  heterotrimeric proteins, resulting in a reduction of  
278 neurotransmitter release at presynaptic terminals (Castillo et al., 2012; Lovinger, 2008).  
279 We therefore tested whether WIN-induced bouton formation requires  $G_{i/o}$  signaling.  
280 We pretreated the slices with pertussis toxin (PTX) (1  $\mu\text{g}/\text{ml}$ ) for 24 hours to eliminate  
281  $G_{i/o}$  signaling (Campbell and Smrcka, 2018; Guo and Ikeda, 2004), and then performed  
282 two-photon time-lapse live imaging as before. Axons with and without CB1R were  
283 distinguished using *post-hoc* immunostaining (Fig. 6A-C). PTX pretreatment had no  
284 major effect on CB1 receptor expression patterns.

285 Under control conditions, CB1R- axons had a higher bouton density compared to  
286 CB1R+ axons (Fig. 6D), which was mainly due to a higher density of NP boutons (Fig.  
287 6E,F). The density for all NP bouton subgroups was almost twice as high in CB1R- axons  
288 compared to CB1R+ axons (Fig. 6G), showing that overall inhibitory bouton dynamics  
289 were more pronounced in CB1R- axons compared to CB1R+ axons. Unexpectedly, we  
290 observed that 24 hr pretreatment with PTX affected bouton density. PTX pretreatment  
291 specifically downregulated bouton density in CB1R- axons, while bouton density in  
292 CB1R+ axons was largely unaffected (Fig. 6D). PTX specifically reduced the density of  
293 non-persistent boutons in CB1R- axons (Fig. 6E,F). After PTX pretreatment there was  
294 no longer a difference in NP bouton subgroups between CB1R+ and CB1R- inhibitory  
295 axons (Fig. 6H). This suggests that under normal conditions CB1R- axons have a higher  
296  $G_{i/o}$  protein activity compared to CB1R+ axons in these slices. These data imply that  
297  $G_{i/o}$  signaling is an important regulator of inhibitory bouton dynamics.  
298

299 We then tested whether acute activation of CB1 receptors via WIN can induce changes



300 in inhibitory bouton dynamics in the absence of  $G_{i/o}$  signaling. We observed that short  
301 activation of CB1 receptors by WIN could still induce the formation of new inhibitory  
302 boutons in CB1R+ axons after pretreatment with PTX (Fig. 7A). This indicates that the  
303 formation of new inhibitory boutons by CB1 receptor activation is independent of  $G_{i/o}$   
304 signaling. However, in the absence of  $G_{i/o}$  signaling WIN application no longer  
305 promoted bouton stabilization (Fig. 7B; compare with Fig. 5F), suggesting that bouton  
306 stabilization requires intact  $G_{i/o}$  signaling. As before, other NP bouton subgroups were  
307 not affected (Fig. 7C) and WIN application did not affect bouton formation (density of  
308 new boutons was  $81 \pm 23$  % of control; MW,  $p = 0.51$ ) or bouton dynamics (data not  
309 shown) in CB1R- axons. These data indicate that short activation of CB1 receptors on  
310 inhibitory axons by WIN promotes the formation of new boutons via a  $G_{i/o}$ -  
311 independent signaling pathway.

312  
313  $G_{i/o}$  protein signaling can hyperpolarize neurons via activation of  $K^+$  channels (Bacci et  
314 al., 2004; Guo and Ikeda, 2004). Blocking ongoing  $G_{i/o}$  activity with PTX may therefore  
315 enhance neuronal activity in our slices, which may by itself affect inhibitory bouton  
316 dynamics. However, as enhancing neuronal activity is expected to promote overall  
317 inhibitory bouton turnover (Frias et al., 2019; Schuemann et al., 2013), this does not  
318 appear in line with the observed decrease in inhibitory bouton dynamics in CB1R-  
319 axons after PTX. To address if WIN-induced inhibitory bouton formation is affected by  
320 activity, we blocked network activity with TTX to reduce overall bouton dynamics (Frias  
321 et al., 2019; Schuemann et al., 2013). We observed that in the presence of TTX, brief  
322 activation of CB1 receptors with WIN still induced the specific increase in the density  
323 of new boutons (Fig. 7D). However, WIN did no longer induce a change in the density  
324 of stabilizing boutons (Fig. 7E), consistent with our earlier finding that inhibitory  
325 bouton stabilization requires activity (Frias et al., 2019). Other NP bouton subgroups  
326 were not affected (Fig. 7F) and WIN application did not significantly affect bouton  
327 formation ( $179 \pm 216$  % of control; MW,  $p = 0.11$ ) or other bouton dynamics (data not  
328 shown) in CB1R- axons. Together these data demonstrate that CB1 receptor-mediated  
329 inhibitory bouton formation does not require  $G_{i/o}$  protein signaling and is independent  
330 of neuronal activity.

### 331 **Acute elevation of cAMP levels promotes inhibitory bouton formation**

332 Besides the typical downstream signaling pathway via  $G_{i/o}$  proteins, CB1R activation  
333 can trigger several other signaling pathways, including via  $G_{12/13}$  (Roland et al., 2014),  
334  $G_q$  (Lauckner et al., 2005) and  $G_s$  proteins (Finlay et al., 2017; Glass and Felder, 1997).  
335 Intriguingly, a novel form of CB1 receptor-mediated synaptic potentiation was recently  
336 reported, which was shown to depend on presynaptic PKA activity (Cui et al., 2016;  
337 Wang et al., 2017). This raises the attention to CB1 receptor-mediated  $G_s$  signaling, as  
338  $G_s$  protein signaling enhances PKA activity via stimulation of cAMP production (Antoni,  
339 2012; Taylor et al., 2013). We therefore tested if inhibitory bouton dynamics were  
340 affected when we directly elevated cAMP levels via activation of adenylyl cyclase (AC)

341 by 25  $\mu$ M forskolin (5 minutes) (Fig. 8A). We observed that brief application of forskolin  
342 induced the formation of new inhibitory boutons (Fig. 8B), while other NP subgroups  
343 were not affected (Fig. 8C,D). This suggests that the inhibitory bouton formation that  
344 we observed after CB1 receptor activation may be mediated by  $G_s$  signaling. The  
345 increase in inhibitory bouton formation after forskolin application appeared much  
346 stronger compared to WIN application (compare Fig. 8B to Fig. 3I), suggesting that  
347 most, if not all, GFP-labeled inhibitory axons responded to forskolin. These data show  
348 that the formation of new inhibitory boutons is promoted by increasing intracellular  
349 cAMP levels via AC stimulation.

### 350 **$G_s$ signaling in inhibitory axons promotes inhibitory bouton formation**

351 Bath application of forskolin strongly increases neuronal activity (Gekel and Neher,  
352 2008; Mitoma and Konishi, 1996) and will raise cAMP levels in all cells in the slice. The  
353 observed specific increase in new inhibitory bouton formation after forskolin, without  
354 affecting overall bouton dynamics, is therefore quite remarkable. However, we cannot  
355 conclude that the observed increase in inhibitory bouton formation is a direct effect  
356 of elevated cAMP levels in the inhibitory axons. We made use of DREADDs (Designer  
357 Receptors Exclusively Activated by Designer Drugs) (Roth, 2016; Urban and Roth, 2015)  
358 to achieve cell-specific manipulation of presynaptic cAMP levels.  $G_s$ -DREADDs allow  
359 the direct activation of the  $G_s$ -protein signaling pathway using the specific ligand CNO.  
360 To achieve sparse expression restricted to inhibitory neurons we infected hippocampal  
361 slices from VGAT-Cre mice with Cre-dependent AAVs. We used two AAVs: one  
362 containing a HA-tagged  $G_s$ -DREADD construct and one containing GFP (Fig. 9A; see  
363 methods for details). Infections with these two AAVs resulted in sparse GFP-labeling of  
364 inhibitory cells and their axons, which partially overlapped with  $G_s$ -HA expression (Fig.  
365 9B). *Post-hoc* immunostaining allowed us to identify GFP-labeled axons with and  
366 without  $G_s$ -HA (HA+ and HA- axons) in the same slice (Fig. 9C,D). We performed two-  
367 photon microscopy to monitor bouton dynamics in GFP-expressing HA+ and HA-  
368 inhibitory axons (Fig. 9E). Bouton dynamics in VGAT-Cre slices were in line with  
369 previous data (Frias et al., 2019), indicating that the AAV infections did not alter overall  
370 bouton dynamics in inhibitory axons. After a 40-minute baseline period,  $G_s$ -DREADDs  
371 were activated via bath application of CNO ligand. We found that CNO activation  
372 strongly increased the density of new boutons in  $G_s$ -HA positive axons compared to  
373 HA- axons (Fig. 9F). Other NP bouton subgroups were not affected, although the  
374 density of stabilizing boutons appeared to be somewhat increased (Fig. 9G,H). These  
375 data show that specific activation of  $G_s$  signaling in inhibitory axons mimics the WIN-  
376 induced inhibitory bouton formation.

377 Together, our results indicate that inhibitory bouton formation after brief CB1 receptor  
378 activation does not require  $G_{i/o}$ -signaling, and that it is mimicked by activation of  $G_s$   
379 signaling in inhibitory axons. This suggests that CB1 receptors on inhibitory axons  
380 couple to  $G_s$  proteins rather than the conventional  $G_{i/o}$  effectors to trigger inhibitory  
381 bouton formation.

382

383

## 384 **Discussion**

385 Here we examined the signaling pathway underlying the CB1 receptor-mediated  
386 formation of new inhibitory synapses. We made several important observations. First  
387 of all, repeated CB1 activation led to an increase in mIPSC frequency and an increase  
388 in the density of presynaptic VGAT clusters, which were not associated with  
389 postsynaptic gephyrin. Inhibitory synapses which do not contain gephyrin are  
390 immature and show reduced transmission (Danglot et al., 2003; Nguyen et al., 2016;  
391 Niwa et al., 2012; Patrizi et al., 2008; Yu et al., 2007). Our observations are in line with  
392 the notion that pre- and postsynaptic signaling pathways during synapse formation are  
393 largely independent (Jiang et al., 2021; Wierenga, 2017) and suggest that CB1  
394 receptors act purely presynaptically. Second, brief activation of CB1 receptors  
395 specifically triggered the formation of inhibitory synapses in CB1R+ axons. This  
396 indicates that formation of inhibitory synapses is mediated by axonal CB1 receptors  
397 and excludes a prominent role for CB1 receptors in astrocytes or postsynaptic neurons.  
398 Third, bouton turnover in inhibitory axons was strongly reduced when  $G_{i/o}$  protein  
399 signaling was blocked by PTX pretreatment. This suggests that modulation of axonal  
400 cAMP levels is an important regulator of bouton turnover in inhibitory axons. Fourth,  
401 CB1 receptor-mediated inhibitory bouton growth was independent of ongoing  $G_{i/o}$   
402 signaling and activity, suggesting that signaling pathways downstream of axonal CB1  
403 receptors differ from presynaptic CB1 receptors. Finally, inhibitory synapse formation  
404 was induced in response to an increase in cAMP after forskolin application, and when  
405  $G_s$  signaling was activated via  $G_s$ -DREADDs, which were expressed exclusively in  
406 inhibitory neurons. These findings revealed that an increase in cAMP is the key second  
407 messenger signal for inhibitory bouton formation and suggest that axonal CB1  
408 receptors trigger inhibitory bouton formation via  $G_s$  instead of  $G_{i/o}$  protein signaling.

409

410 Our present study has limitations that are important to mention here. First of all, we  
411 use transgenic mice in which several inhibitory neuron subtypes are labeled with GFP  
412 (Wierenga et al., 2010). This unspecific labeling diluted and hampered the detection  
413 of axon-specific effects (Fig. 2). However, we used it to our advantage by performing  
414 posthoc immunostaining to distinguish between different inhibitory axon types. This  
415 allowed comparison between CB1R+ and CB1R-, or HA+ and HA- axons in the same  
416 slice and avoided comparison between slices from different GFP-labeled mouse lines.  
417 Another limitation of our study is that we have used bath application of CB1 agonist  
418 WIN to trigger inhibitory bouton formation. Under physiological conditions,  
419 endocannabinoid signals are likely transient and highly localized (Hashimotodani et al.,  
420 2007; Hu et al., 2019; Monday and Castillo, 2017), providing spatial and temporal  
421 control over inhibitory synapse formation. We elevated cAMP levels to trigger  
422 inhibitory bouton formation by bath application of forskolin or by activation of  $G_s$ -

423 DREADDs in inhibitory cells. While this allowed separation of formation and  
424 stabilization of inhibitory boutons, it likely abolished spatial modulations. Axons  
425 contain several phosphodiesterases, which rapidly degrade cAMP and provide  
426 spatiotemporal compartmentalization of cAMP signaling (Argyrousi et al., 2020; Baillie,  
427 2009). Pretreatment with PTX will disturb these cAMP modulations and this strongly  
428 reduced inhibitory bouton dynamics and abolished the difference between CB1R+ and  
429 CB1R- axons (Fig. 6L). This indicates that CB1R- axons have higher  $G_{i/o}$  baseline activity  
430 compared to CB1R+ axons and suggests that cAMP modulation is an important factor  
431 regulating inhibitory bouton dynamics. Future research should further assess the  
432 relationship between cAMP signaling and inhibitory bouton turnover.

433

434 Synapse formation is a multistep process, with each step regulated by specific signaling  
435 pathways (Jiang et al., 2021; Wierenga, 2017). Our detailed two-photon analysis allows  
436 dissecting these steps and addressing the involved signaling pathways. Inhibitory  
437 synapse formation starts with the growth of a new bouton at an axonal location where  
438 the inhibitory axon is in close proximity to a dendrite (Dobie and Craig, 2011; Hu et al.,  
439 2019; Villa et al., 2016; Wierenga et al., 2008). Our data indicate that axonal CB1  
440 receptors can trigger bouton formation, which does not require neuronal activity. We  
441 observed that CB1 receptor-mediated inhibitory bouton formation was not affected in  
442 the presence of TTX (Fig. 7D). In addition, we observed that forskolin, which strongly  
443 raises neuronal activity (data not shown), did not affect overall bouton turnover (Fig.  
444 8D). This was unexpected given our previous observations that inhibitory bouton  
445 turnover is enhanced by neuronal activity (Frias et al., 2019; Schuemann et al., 2013).  
446 On the other hand, we observed that blocking  $G_{i/o}$  signaling strongly affected bouton  
447 turnover (Fig. 6F,H), which appeared independent of activity. These data suggest that  
448 axonal cAMP is the primary second messenger affecting inhibitory bouton formation,  
449 which is indirectly modulated by activity, possibly via changes in neuromodulatory  
450 signals.

451 Our data indicate that axonal CB1 receptors can directly trigger bouton formation via  
452 an increase in cAMP, while subsequent bouton stabilization and postsynaptic assembly  
453 requires additional signaling. WIN-induced bouton stabilization was prevented when  
454  $G_{i/o}$  signaling was blocked by PTX (Fig. 7B), and bouton stabilization was not altered by  
455 increasing cAMP levels with forskolin (Fig. 8C), although it may be facilitated with  
456 longer elevations (Fig. 9H). These data suggest that after the initial formation, CB1  
457 receptors may also promote bouton stabilization via a more indirect pathway. We  
458 previously showed that bouton stabilization requires neuronal activity and involves  
459 local actin remodeling via a reduction in ROCK activity (Frias et al., 2019). Interactions  
460 between CB1 receptor signaling and ROCK activity (Berghuis et al., 2007) and actin  
461 remodeling (Njoo et al., 2015; Zhou et al., 2019) have been reported, but future  
462 research should further clarify the precise nature of these interactions.

463

464 CB1 receptors are highly versatile and are involved in many neuronal processes via

465 multiple downstream pathways, including axon guidance and synaptic plasticity  
466 (Araque et al., 2017; Berghuis et al., 2007; Monday and Castillo, 2017; Njoo et al., 2015;  
467 Roland et al., 2014). There are multiple factors, including interacting proteins  
468 (Guggenhuber et al., 2016), which determine which downstream signaling pathway is  
469 activated after CB1 receptor activation (Flores-Otero et al., 2014; Nogueras-Ortiz and  
470 Yudowski, 2016) and this functional selectivity of CB1 receptors may have important  
471 clinical relevance (Ibsen et al., 2017; Laprairie et al., 2017; Sholler et al., 2020). It was  
472 recently reported that the duration of CB1 receptor activation determines the  
473 direction of plasticity at corticostriatal synapses with brief activation inducing LTP,  
474 while prolonged activation induces LTD (Cui et al., 2016, 2015). Our data suggest that  
475 brief activation of axonal CB1 receptors promotes the formation of new inhibitory  
476 boutons via  $G_s$ -mediated elevation of cAMP levels, but we have not extensively tested  
477 longer activations or different ligand concentrations. It is possible that the subcellular  
478 location of CB1 receptors affects downstream signaling pathway: CB1 receptors at  
479 presynaptic terminals couple to  $G_{i/o}$  to affect GABA release (Guo and Ikeda, 2004; Lee  
480 et al., 2015), while CB1 receptors in the axonal shaft of the same inhibitory axons may  
481 couple to  $G_s$  proteins. Even though CB1 receptors prefer coupling to  $G_i$ -proteins, they  
482 can switch to  $G_s$  when  $G_i$ -proteins are not available or already occupied (Caballero-  
483 Florán et al., 2016; Eldeeb et al., 2016; Finlay et al., 2017; Glass and Felder, 1997). This  
484 may suggest that  $G_i$  proteins are only available at presynaptic terminals, while  $G_s$   
485 protein coupling could be dominant in axons.

486  
487

488 Our experiments do not address which effectors are downstream of cAMP to trigger  
489 inhibitory bouton formation. The most prominent effector of cAMP is protein kinase A  
490 (PKA). Presynaptic PKA activity is involved in CB1-mediated synaptic plasticity  
491 (Chevalleyre et al., 2007; Cui et al., 2016) and also is therefore a strong candidate for  
492 regulating presynaptic bouton formation. PKA may for instance alter local clustering  
493 and inter-bouton exchange of synaptic vesicles (Chenouard et al., 2020; Patzke et al.,  
494 2019). PKA resides close to the plasma membrane and preferably phosphorylates  
495 membrane proteins in its close proximity (Tillo et al., 2017). However, potential PKA  
496 targets to mediate inhibitory bouton formation remain yet to be identified. In addition,  
497 there are important PKA-independent pathways downstream of cAMP signaling, most  
498 importantly via Epac2 (Kawasaki et al., 1998). Epac2 activity can strongly increase  
499 synaptic transmission (Fernandes et al., 2015; Gekel and Neher, 2008), yet a role in  
500 synapse formation has not been reported. Interestingly, Epac2 was recently found to  
501 be downstream of  $G_s$ -coupled  $\beta$  adrenergic receptors to mediate presynaptic LTP at  
502 parallel fiber synapses to Purkinje cells (Martín et al., 2020). cAMP signaling via PKA,  
503 Epac2 or Rho GTPases may affect the axonal cytoskeleton. Actin is important in the  
504 formation, stabilization and maintenance of presynaptic terminals (Bednarek and  
505 Caroni, 2011; Chenouard et al., 2020; Chia et al., 2014, 2013; Frias et al., 2019; Pielage  
506 et al., 2011) and cAMP fluctuations may drive local modifications in the actin

507 cytoskeleton (Bernier et al., 2019) underlying structural presynaptic changes.  
508  
509 Our findings suggest that axonal CB1 receptors serve an important role in local, on  
510 demand synapse formation. Our observation that inhibitory bouton formation was  
511 more prominent after cAMP elevation than after WIN application (compare Fig. 8B and  
512 9F to 3I) suggests that axonal cAMP signaling is an important second messenger signal  
513 mediating bouton formation not only in CB1R+, but perhaps in all, inhibitory axons.  
514 Intriguingly, our observations are reminiscent of cAMP-mediated bouton formation in  
515 zebrafish (Yoshida and Mishina, 2005), *Aplysia* (Bailey and Kandel, 1993; Nazif et al.,  
516 1991; Upreti et al., 2019) and *Drosophila* axons (Koon et al., 2011; Maiellaro et al.,  
517 2016; Zhong et al., 1992). This raises the possibility that axonal cAMP signaling is a  
518 universal second messenger system for regulating structural plasticity in axons.  
519 Activation of CB1 receptors via dendritic endocannabinoid signaling (Hu et al., 2019)  
520 then represents one specific way to trigger cAMP-mediated bouton formation in  
521 CB1R+ axons in response to strong excitatory synaptic activity. Other axons may  
522 employ different axonal receptors to mediate bouton formation. Indeed, GABAergic  
523 interneurons express many different G-proteins (Cox et al., 2008; Helboe et al., 2015;  
524 Puighermanal et al., 2017), which often provide neuromodulatory context signals from  
525 other brain areas (Hattori et al., 2017). Our findings raise the intriguing possibility that  
526 neuromodulatory receptors on the axonal surface provide the opportunity to build a  
527 new inhibitory bouton on demand, triggered by axon-specific and context-dependent  
528 signaling.  
529  
530  
531

## 532 Figure legends

### 533 **Figure 1. Repeated CB1 receptor activation results in increased mIPSC frequency.**

534 **(A)** Organotypic hippocampal cultures were treated 3 times with culturing medium  
535 containing 100  $\mu$ M 2-AG or DMSO (control) for 20 minutes with 2 hour intervals. After  
536 24 hours, slices were used for electrophysiology and immunostaining experiments.

537 **(B)** Example traces of miniature inhibitory postsynaptic currents (mIPSCs) recordings  
538 from control (black) and 2-AG treated slice (red).

539 **(C, D)** Mean frequency (C) and amplitude (D) of mIPSCs in control and 2-AG treated  
540 slices (MW,  $p = 0.013$  in C and  $p = 0.16$  in D). Data from 22 cells in 6 control slices and  
541 19 cells in 6 2-AG treated slices.

542 **(E, F)** Mean frequency (E) and amplitude (F) of sIPSCs in control and 2-AG treated  
543 slices, when 2-AG was continuously present for 24 hr ( $p = 0.99$  in E and  $p = 0.95$  in F;  
544 MW). Data from 11 cells in 5 control slices and 11 cells in 6 2-AG treated slices.

545 **(G)** Mean rise time of mIPSCs in control and 2-AG treated slices (MW,  $p = 0.073$ ).

546 **(H)** Mean of mIPSC decay time in control and 2-AG treated slices (MW,  $p = 0.19$ ).

547 **(I)** The distribution of rise times of mIPSCs was fitted with a double Gaussian to  
548 separate fast and slow mIPSCs.

549 **(J,K)** Cumulative distribution of interevent intervals of mIPSCs with fast (J) and slow  
550 (K) rise times (KS,  $p = 0.65$  in J, and  $p < 0.0001$  in K).

551 **(L)** Mean frequency of mIPSCs with fast and slow rise times (2w ANOVA Sidak, fast:  
552  $p = 0.14$ ; slow:  $p = 0.0095$ ).

553 Data in G-L and C,D are from the same data set.

554

### 555 **Figure 2. Repeated CB1 receptor activation induces the formation of partial** 556 **inhibitory synapses.**

557 **(A)** Representative immunostaining images showing the presynaptic VGAT (blue)  
558 and postsynaptic gephyrin (purple) in control (upper) and 2-AG (lower) slices.  
559 Individual VGAT puncta were identified using watershed segmentation and these were  
560 color coded to distinguish VGAT puncta associated with gephyrin (blue) and VGAT  
561 puncta without gephyrin (red).

562 **(B, C)** Normalized density (B) and size (C) of VGAT puncta in control and 2-AG slices  
563 (MW,  $p = 0.0061$  in B;  $p = 0.004$  in C).

564 **(D, E)** Normalized density (D) and size (E) of gephyrin puncta in control and 2-AG  
565 slices (MW,  $p = 0.54$  in D;  $p = 0.64$  in E).

566 **(F, G)** Normalized density (F) and size (G) of VGAT/gephyrin colocalizations in control  
567 and 2-AG slices (MW,  $p = 0.76$  in F;  $p = 0.099$  in G).

568 **(H, I)** Normalized density (F) and size (G) of VGAT puncta with and without gephyrin  
569 (2w ANOVA Sidak,  $p = 0.55$  and  $p = 0.003$  in H;  $p = 0.017$  and  $p = 0.65$  in I).

570 Data from 13 image stacks in 7 slices per group.

571

572

573 **Figure 3. Brief activation of CB1 receptors slightly increases NP bouton density**

574 **(A)** Representative two-photon time lapse images of GAD65-GFP labelled inhibitory  
575 axons in the dendritic region of the hippocampal CA1 area (maximal projections of 17  
576 z-sections). After a baseline of five time points (40 minutes), CB1 receptor agonist or  
577 DMSO was washed in for 5 minutes. Imaging was continued for another ten time  
578 points (total imaging period is 140 minutes). Persistent boutons (blue) and non-  
579 persistent (NP) boutons (orange) are indicated by arrow heads. Empty arrow heads  
580 reflect a NP bouton which was absent at the time point. Scale bar is 2  $\mu\text{m}$ .

581 **(B)** CB1 receptors were activated by bath application of 100  $\mu\text{M}$  2-AG for 5 minutes.  
582 Normalized NP bouton density over time in control (black) slices and after 2-AG (red)  
583 application (2w ANOVA,  $p = 0.33$ ).

584 **(C)** Maximum change in NP bouton density in control slices and after 2-AG  
585 application (MW,  $p = 0.54$ ).

586 **(D)** Normalized NP presence over time in control and 2-AG treated slices. P1= time  
587 points 1 to 5, P2= time points 6 to 10, and P3= time points 11 to 15) in control and 2-  
588 AG treated slices (2w ANOVA,  $p = 0.61$ ).

589 **(E)** Mean density of NP bouton subgroups in control slices and after 2-AG application.  
590 N – new boutons (MW,  $p = 0.35$ ); L – lost boutons (MW,  $p = 0.44$ ); S – stabilizing boutons  
591 (MW,  $p = 0.21$ ); D – destabilizing boutons (MW,  $p = 0.91$ ); I – intermittent boutons (MW,  
592  $p = 0.87$ ).

593 **(F)** CB1 receptors were activated by bath application of 20  $\mu\text{M}$  WIN for 5 minutes.  
594 Normalized NP bouton density over time in control (black) slices and after 2-AG (green)  
595 application (2w ANOVA,  $p = 0.20$ ).

596 **(G)** Maximum change in NP bouton density in control slices and after WIN  
597 application (MW,  $p = 0.11$ ).

598 **(H)** Normalized NP presence over time in control slices and after WIN application  
599 (2w ANOVA,  $p = 0.20$ ).

600 **(I)** Mean density of NP bouton subgroups in control slices and after WIN application  
601 (MW,  $p = 0.40$  (N);  $p = 0.06$  (L);  $p = 0.79$  (S);  $p = 0.70$  (D);  $p = 0.10$ (I)).

602 **(J)** Slices were treated with the CB1 receptor antagonist AM251 (5  $\mu\text{M}$ ) after time  
603 point 5. Normalized NP bouton density over time in control (black) slices and during  
604 AM251 (blue) application (2w ANOVA,  $p = 0.66$ ).

605 **(K)** Maximum change in NP bouton density in control slices and during AM251  
606 application (MW,  $p = 0.6$ ).

607 **(L)** Normalized NP presence over time in control slices and during AM251 application  
608 (2w ANOVA,  $p = 0.56$ ).

609 **(M)** Mean density of NP bouton subgroups in control slices and during AM251  
610 application (MW,  $p = 0.46$  (N);  $p = 0.23$  (L);  $p = 0.94$  (S);  $p = 0.29$  (D);  $p = 0.10$ (I)).

611 Data in A from 24 axons in 6 control slices and 23 axons in 6 2-AG slices. Data in B from  
612 24 axons in 7 control slices and 22 axons in 7 WIN slices. Data in C from 20 axons in 5  
613 control slices and 20 axons in 5 AM251 slices.



614

615 **Figure 4. Distinction between CB1R+ and CB1R- axons using post hoc**  
616 **immunohistochemistry**

617 **(A)** Z-projection of representative two-photon image of GFP-labeled inhibitory axons.  
618 After two-photon live imaging, the slice was immediately fixated and further  
619 processed for immunohistochemistry to assess CB1R expression.

620 **(B)** Confocal images of the same area after post hoc immunohistochemistry, showing  
621 the same GFP-labeled axons (B1) as in A (indicated with solid and dashed red boxes).  
622 Immunostaining against CB1 receptors (B2) show a clear distinction between CB1R+  
623 axons (solid red box), which express CB1 receptors, which cover the entire axonal  
624 surface, and CB1R- axons (dashed red box). Which do not express CB1 receptors.

625 **(C)** Two-photon time lapse imaging of bouton dynamics in the CB1R+ and CB1R-  
626 axons indicated in A and B. Arrow heads indicate P (blue) and NP (orange) boutons as  
627 in Fig. 3A.

628 Scale bars are 10  $\mu\text{m}$  in A,B and 2  $\mu\text{m}$  in C,D.

629

630 **Figure 5. WIN promotes formation and stabilization of inhibitory boutons only in**  
631 **CB1R+ axons**

632 **(A)** Normalized NP bouton density in CB1R+ axons over time in control (black) slices  
633 and after WIN (green) application (2w ANOVA,  $p = 0.018$ ; interaction  $p = 0.026$ ).

634 **(B)** Maximum change in NP bouton density in CB1R+ axons in control (black) slices  
635 and after WIN (green) application (MW,  $p = 0.047$ ).

636 **(C)** Normalized NP presence in CB1R+ axons over time in control slices and after WIN  
637 application (2w ANOVA,  $p = 0.022$ ; interaction  $p = 0.045$ ).

638 **(D-H)** Mean density of NP bouton subgroups in CB1R+ axons in control slices and  
639 after WIN application. D, new boutons (MW,  $p = 0.002$ ); E, lost boutons (MW,  $p = 0.39$ );  
640 F, stabilizing boutons (MW,  $p = 0.005$ ); G, destabilizing boutons (MW,  $p = 0.87$ ); H,  
641 intermittent boutons (MW,  $p = 0.16$ ).

642 **(I)** Normalized NP bouton density in CB1R- axons over time in control (black) slices  
643 and after WIN (green) application (2w ANOVA,  $p = 0.27$ ).

644 **(J)** Maximum change in NP bouton density in CB1R- axons in control (black) slices  
645 and after WIN (green) application (MW,  $p = 0.21$ ).

646 **(K)** Normalized NP presence in CB1R- axons over time in control slices and after WIN  
647 application (2w ANOVA,  $p = 0.37$ ).

648 **(L-P)** Mean density of NP bouton subgroups in CB1R- axons in control slices and after  
649 WIN application. L, new boutons (MW,  $p = 0.77$ ); M, lost boutons (MW,  $p = 0.46$ ); N,  
650 stabilizing boutons (MW,  $p = 0.50$ ); O, destabilizing boutons (MW,  $p = 0.99$ ); P,  
651 intermittent boutons (MW,  $p = 0.34$ ).

652 Data from 25 CB1R+ and 16 CB1R- axons in 4 control slices and 20 CB1R+ and 15 CB1R-  
653 axons in 4 slices with WIN application.

654

655

656 **Figure 6.  $G_{i/o}$  signaling is an important regulator of inhibitory bouton dynamics**  
657 **(A)** Z-projection of representative two-photon image of GFP-labeled inhibitory axons  
658 after PTX pretreatment.  
659 **(B)** Confocal images of the same area after post hoc immunohistochemistry, showing  
660 the same GFP-labeled axons (B1) as in A (solid and dashed red boxes indicate CB1R+  
661 and CB1R- axons).  
662 **(C)** Two-photon time lapse imaging of bouton dynamics in the CB1R+ and CB1R-  
663 axons indicated in A and B after PTX pretreatment. Arrow heads indicate P (blue) and  
664 NP (orange) boutons as in Fig. 3A.  
665 **(D)** Average bouton density during baseline in CB1R+ and CB1R- axons in control  
666 slices and after PTX pretreatment. Comparisons between CB1R+ and CB1R- axons:  $p$   
667 = 0.0056 for control,  $p = 0.79$  after PTX; between control and PTX:  $p = 0.11$  for CB1R-  
668 axons,  $p > 0.99$  for CB1R+ axons; between CB1R+ (control) and CB1R- (PTX):  $p = 0.86$   
669 and between CB1R- (control) and CB1R+ (PTX):  $p = 0.0057$  (2w ANOVA Sidak).  
670 **(E)** Average density of persistent (P) boutons during baseline in CB1R+ and CB1R-  
671 axons in control slices and after PTX pretreatment ( $p=0.057$  for axon type, 2w ANOVA  
672 Sidak).  
673 **(F)** Average density of non-persistent (NP) boutons during baseline in CB1R+ and  
674 CB1R- axons in control slices and after PTX pretreatment. Comparisons between  
675 CB1R+ and CB1R- axons:  $p = 0.0007$  for control,  $p = 0.99$  after PTX; between control  
676 and PTX:  $p < 0.0001$  for CB1R- axons,  $p > 0.99$  for CB1R+ axons; between CB1R+  
677 (control) and CB1R- (PTX):  $p = 0.93$  and between CB1R- (control) with CB1R+ (PTX):  
678  $p = 0.0008$  (2w ANOVA Sidak).  
679 **(G)** Mean density of NP bouton subgroups in CB1R+ and CB1R- axons in control slices.  
680 N – new boutons (MW,  $p = 0.035$ ); L – lost boutons (MW,  $p = 0.037$ ); S – stabilizing  
681 boutons (MW,  $p = 0.002$ ); D – destabilizing boutons (MW,  $p = 0.47$ ); I – intermittent  
682 boutons (MW,  $p = 0.010$ ).  
683 **(H)** Mean density of NP bouton subgroups in CB1R+ and CB1R- axons after PTX  
684 pretreatment (MW,  $p = 0.45$  (N);  $p = 0.41$  (L);  $p = 0.36$  (S);  $p = 0.88$  (D);  $p = 0.40$ (I)).  
685 Data from 23 CB1R+ and 16 CB1R- axons in 4 control slices, and 18 CB1R+ and 21 CB1R-  
686 axons in 4 PTX-pretreated slices. Scale bars are 10  $\mu\text{m}$  in A,B and 2  $\mu\text{m}$  in C,D.

687

688 **Figure 7. CB1-mediated bouton formation does not require  $G_{i/o}$  signaling and is**  
689 **independent of activity.**

690 **(A)** Mean density of new boutons in CB1R+ axons after control (black) and WIN  
691 (green) application in PTX-pretreated slices (MW,  $p = 0.047$ ).

692 **(B)** Mean density of stabilizing boutons in CB1R+ axons after control and WIN  
693 application in PTX-pretreated slices (MW,  $p = 0.93$ ).

694 **(C)** Mean density of other NP bouton subgroups in CB1R+ axons after control and  
695 WIN application in PTX-pretreated slices. L – lost boutons (MW,  $p = 0.82$ ); D –  
696 destabilizing boutons (MW,  $p = 0.37$ ); I – intermittent boutons (MW,  $p = 0.59$ ).

697 **(D)** Mean density of new boutons in CB1R+ axons after control (black) and WIN

698 (green) application in the presence of TTX (MW,  $p = 0.013$ ).  
699 **(E)** Mean density of stabilizing boutons in CB1R+ axons after control and WIN  
700 application in the presence of TTX (MW,  $p = 0.61$ ).  
701 **(F)** Mean density of other NP bouton subgroups in CB1R+ axons after control and  
702 WIN application in the presence of TTX. L – lost boutons (MW,  $p = 0.23$ ); D –  
703 destabilizing boutons (MW,  $p = 0.56$ ); I – intermittent boutons (MW,  $p = 0.16$ ).  
704 Data in A-C from 18 axons in 4 slices with DMSO (control) application and 18 axons in  
705 4 slices with WIN application. Data in D-F from 14 axons in 4 slices with DMSO (control)  
706 application and 15 axons in 5 slices with WIN application.

707

708 **Figure 8. Inhibitory bouton formation is promoted by increasing intracellular cAMP**  
709 **levels with forskolin**

710 **(A)** Representative two-photon time lapse images of bouton dynamics in GFP-  
711 labeled axons after control or forskolin application. Arrow heads indicate P (blue) and  
712 NP (orange) boutons as in Fig. 3A. Scale bar is 2  $\mu\text{m}$ .

713 **(B)** Mean density of new boutons in control (black) slices and after forskolin (blue)  
714 application (MW,  $p = 0.007$ ).

715 **(C)** Mean density of stabilizing boutons in control slices and after forskolin  
716 application (MW,  $p = 0.67$ ).

717 **(D)** Mean density of other subgroup of NP boutons in control slices and after  
718 forskolin application. L – lost boutons (MW,  $p = 0.46$ ); D – destabilizing boutons (MW,  
719  $p = 0.37$ ); I – intermittent boutons (MW,  $p = 0.81$ ).

720 Scale bars are 2  $\mu\text{m}$ .

721

722 **Figure 9. Specific activation of Gs at inhibitory axons induce new bouton formation.**

723 **(A)** Experimental design. Hippocampal slice cultures are prepared from P7 VGAT-Cre  
724 mouse pups. At DIV1 (days *in vitro*), AAV5-hSyn-DIO-EGFP and AAV5-hSyn-DIO-Gs-HA  
725 viruses are applied to the VGAT-Cre slice cultures. After 2-3 weeks (DIV 14-21) slices  
726 were used for two-photon live imaging and *post hoc* immunostaining to reveal Gs-HA  
727 expression.

728 **(B)** Representative example of VGAT-Cre slice culture at DIV20 showing sparse  
729 expression of GFP and Gs-HA in GABAergic cells. Right images (zoom from white box)  
730 show Gs-HA and EGFP co-expression in a subset of neurons (red arrow heads).

731 **(C)** Z-projection of representative two-photon image of GFP-labeled inhibitory axons  
732 in VGAT-Cre slice.

733 **(D)** Confocal images of the same area in C after *post hoc* immunohistochemistry  
734 against HA, showing the same GFP-labeled axons as in A (solid and dashed red boxes  
735 indicate HA+ and HA- axons).

736 **(E)** Two-photon time lapse imaging of bouton dynamics in the HA+ and HA- axons  
737 indicated in C and D. Gs-DREADDs were activated by bath application of 10  $\mu\text{M}$  CNO  
738 after the 40 minutes baseline period. Arrow heads indicate P (blue) and NP (orange)  
739 boutons as in Fig. 3A.

740 **(F)** Mean density of new boutons at HA+ and HA- axons in response to Gs-DREADD  
741 activation (MW,  $p = 0.003$ ).

742 **(G)** Mean density of stabilizing boutons at HA+ and HA- axons in response to Gs-  
743 DREADD activation (MW,  $p = 0.10$ ).

744 **(H)** Mean density of other subgroup of NP boutons at HA+ and HA- axons in response  
745 to Gs-DREADD activation. L – lost boutons (MW,  $p = 0.30$ ); D – destabilizing boutons  
746 (MW,  $p = 0.44$ ); I – intermittent boutons (MW,  $p = 0.85$ )

747 Data from 11 HA+ and 11 HA- axons in 4 slices. Scale bars are 200  $\mu\text{m}$  (overview) and  
748 20  $\mu\text{m}$  (zoom) in B, 10  $\mu\text{m}$  in C,D and 2  $\mu\text{m}$  in E.

749

## 750 **Materials and Methods**

### 751 **Animals**

752 All animal experiments were performed in compliance with the guidelines for the  
753 welfare of experimental animals issued by the Federal Government of The Netherlands.  
754 All animal experiments were approved by the Animal Ethical Review Committee (DEC)  
755 of Utrecht University.

756

### 757 **Mouse hippocampal slice culture**

758 Organotypic mouse hippocampal slices were acquired from female and male GAD65-  
759 GFP mice at 6-7 days after birth. In these mice, ~20% interneurons are labelled by GFP  
760 from early embryonic developmental stage into adulthood (López-Bendito et al., 2004).  
761 Most GFP-labelled interneurons target dendrites of CA1 pyramidal cells and express  
762 VIP or reelin, while parvalbumin and somatostatin-positive neurons are not labelled  
763 (Wierenga et al., 2010). Slice culture preparation details are described previously (Frias  
764 et al., 2019; Hu et al., 2019). Mice were sacrificed and the isolated hippocampus was  
765 placed in ice-cold HEPES-GBSS (containing 1.5 mM CaCl<sub>2</sub>·2H<sub>2</sub>O, 0.2 mM KH<sub>2</sub>PO<sub>4</sub>, 0.3  
766 mM MgSO<sub>4</sub>·7H<sub>2</sub>O, 5 mM KCl, 1 mM MgCl<sub>2</sub>·6H<sub>2</sub>O, 137 mM NaCl, 0.85 mM Na<sub>2</sub>HPO<sub>4</sub> and  
767 12.5 mM HEPES) supplemented with 12.5 mM HEPES, 25 mM glucose and 1 mM  
768 kynurenic acid (pH set around 7.2, osmolarity set around 320 mOsm, sterile filtered).  
769 Slices were vertically chopped along the long axis of hippocampus at thickness of 400  
770 µm. They were then quickly washed with culturing medium (consisting of 48% MEM,  
771 25% HBSS, 25% horse serum, 30 mM glucose and 12.5 mM HEPES, pH set at 7.3-7.4  
772 and osmolarity set at 325 mOsm), and transferred to Millicell cell culture inserts  
773 (Milipore) in 6-well plates. Slices were cultured in an incubator (35 °C, 5% CO<sub>2</sub>) until  
774 use. Culturing medium was completely replaced twice a week. Slices were used after  
775 2 to 3 weeks *in vitro*, when the circuitry is relatively mature and stable (De Simoni et  
776 al., 2003).

777

### 778 **Pharmacological treatments**

779 The following drugs were used: 20 µM WIN 55212-2 (WIN; Tocris Bioscience), 100 µM  
780 2-AG (Tocris Bioscience), 25 µM forskolin (Abcam), Pertussis toxin 1 µg/ml (Tocris  
781 Bioscience), 10 µM CNO (Tocris Bioscience), 5 µM AM251 (Tocris Bioscience). For acute  
782 treatments, ACSF containing the drug or 0.1% DMSO vehicle was bath applied for 5  
783 minutes. AM251 and CNO were bath applied after a baseline period (5 time points)  
784 and continued until the end of the experiment. Pertussis toxin was added to the slice  
785 culture medium and a small drop was placed on top of the slice 24 hours before the  
786 start of the experiment. Treated slices were kept in the incubator.

787 CB1 receptor activation can result in different downstream signaling pathways, which  
788 depend on ligand concentration and duration (Cui et al., 2016, 2015). We used a  
789 relatively high concentration of WIN (20 µM) to aim for strong activation of CB1

790 receptors. We used short applications to mimic CB1 receptor activation under  
791 physiological conditions (Hu et al., 2019) and to avoid the induction of synaptic  
792 depression (Monday et al., 2020).

793 For repeated treatment of 2-AG, normal culturing medium was replaced by medium  
794 containing 100  $\mu$ M 2-AG or 0.1% DMSO for 20 minutes. This was repeated 3 times with  
795 2 hours intervals. At the start of each medium replacement, a small drop was placed  
796 on top of the slices to facilitate exchange. A treatment duration of 20 minutes (rather  
797 than 5) was chosen to ensure penetration in the entire slice as solution exchange may  
798 be slower in the incubator compared to the microscope bath. After the last treatment,  
799 the medium was replaced 3 times with fresh medium to ensure wash out. During and  
800 after the treatment slices were kept in the incubator and experiments  
801 (immunocytochemistry or electrophysiology) were performed 24 hours after the start  
802 of the first treatment.

803

804

### 805 **Electrophysiology recording and analysis**

806 Slices were transferred to a recording chamber which was continuously perfused with  
807 carbogenated artificial cerebrospinal fluid (ACSF; containing 126 mM NaCl, 3 mM KCl,  
808 2.5 mM CaCl<sub>2</sub>, 1.3 mM MgCl<sub>2</sub>, 1.25 mM NaH<sub>2</sub>PO<sub>4</sub>, 26 mM NaHCO<sub>3</sub>, 20 mM glucose and  
809 1 mM Trolox) at 32 °C. Whole-cell patch clamp measurements were recorded with a  
810 MultiClamp 700B amplifier (Molecular Devices) and stored using pClamp 10 software.  
811 Recordings were filtered with a 3 kHz Bessel filter. Thick-walled borosilicate pipettes of  
812 4–6 M $\Omega$  were filled with pipette solution containing (in mM): 70 K-gluconate, 70 KCl,  
813 0.5 EGTA, 10 HEPES, 4 MgATP, 0.4 NaGTP, and 4 Na<sub>2</sub>-phosphocreatine. Cells were  
814 discarded if series resistance was above 35 M $\Omega$  or if the resting membrane potential  
815 exceeded -50 mV. Recordings were excluded when the series resistance after the  
816 recording deviated more than 30% from its original value. To isolate miniature  
817 inhibitory postsynaptic currents (mIPSCs) TTX, AP5 and DNQX were added to the ACSF.  
818 The mIPSCs were analyzed in pClamp and Matlab with homemade scripts (Ruiter et al.,  
819 2020). Rise time of mIPSCs were determined as the time between 10% and 90% of the  
820 peak value. The distribution of the rise times of mIPSCs recorded in control conditions  
821 (generated from 150 mIPSCs per cell) were fitted with two Gaussians and their crossing  
822 point determined the separation between fast and slow mIPSCs (Ruiter et al., 2020). A  
823 double Gaussian fit for the rise time distribution in 2-AG conditions gave a similar  
824 separation value (control: 0.9 ms; 2-AG: 1.1 ms) and we verified that our conclusions  
825 did not change by taking the 2-AG separation value.

826

827

### 828 **Two-photon time lapse imaging**

829 Time-lapse two-photon imaging was performed in carbogenated, continuously  
830 perfused ACSF at 32 °C. Slices were transferred in a 3 cm dish containing ACSF. Two-  
831 photon imaging was performed on a customized two-photon laser scanning

832 microscope (Femto2D, Femtonics, Budapest, Hungary) with a Ti-Sapphire  
833 femtosecond pulsed laser (MaiTai HP, Spectra-Physics) with a 60x water immersion  
834 objective (Nikon NIR Apochromat, NA = 1.0). A 4x objective (Nikon Plan Apochromat)  
835 was used to determine the location of the dendritic layer of the CA1 region. GFP was  
836 excited at 910 nm to visualize GFP-labelled axons. 3D image stacks were acquired at a  
837 size of 93.5  $\mu\text{m}$  x 93.5  $\mu\text{m}$  (1124 x 1124 pixels) with 50-63 z-steps (0.5  $\mu\text{m}$  step size).  
838 Acquisition time per image stack was  $\sim$ 7 minutes. We acquired image stacks every 10  
839 minutes, with a total of 15 time points (140 minutes). After a baseline of 5 time points,  
840 drugs were bath applied.

841 For slices in which we performed post-hoc immunostaining, an overview of the  
842 imaging region was made after the last time point (203  $\mu\text{m}$  x 203  $\mu\text{m}$ ,  $\sim$ 50 z-steps of  
843 1.0  $\mu\text{m}$  step size), and a line scar was made using high intensity laser power at 910 nm  
844 at the edge of the zoomed out imaging area to facilitate alignment with post-hoc  
845 confocal microscopy.

846

847

#### 848 **Two-photon image analysis**

849 Individual axons with at least 50  $\mu\text{m}$  length were traced using the CellCounter plugin  
850 imbedded in Fiji for all time points (TPs). Individual boutons were identified with  
851 custom-built semi-automatic Matlab software, as described previously (Frias et al.,  
852 2019). In short, a 3D axonal intensity profile was reconstructed at each TP and  
853 individual boutons were selected based on a local threshold (0.5 standard deviation  
854 above mean axon intensity). Only boutons containing at least 5 pixels above threshold  
855 were included. All boutons at all time points were visually inspected and manual  
856 corrections were made if deemed necessary.

857

858 Persistent (P) boutons were defined as boutons which were present at all TPs. Non-  
859 persistent (NP) boutons were absent at one or more TPs. Boutons which were present  
860 for only one time point were considered transport events and were excluded (Frias et  
861 al., 2019; Schuemann et al., 2013). Based on their presence or absence during baseline  
862 (first 5 TP) and after treatment, NP boutons were further classified into five subgroups  
863 (Frias et al., 2019; Ruitter et al., 2021): new boutons (only present after baseline), lost  
864 boutons (only present during baseline), stabilizing boutons (non-persistent during  
865 baseline, persistent after treatment), destabilizing boutons (persistent during baseline,  
866 non-persistent after treatment), intermittent boutons (non-persistent during baseline  
867 and after treatment).

868 Bouton density was calculated per axon as the average number of boutons at each TP  
869 divided by the 3D axon length. NP bouton density was determined for each TP as the  
870 number of NP boutons that were present divided by the 3D axon length. NP bouton  
871 densities were normalized to the average baseline value (first 5 TP) to allow  
872 comparison between axons. The maximum change in NP bouton density change was  
873 calculated as the maximum NP bouton density (average over 3TPs) divided by the

874 baseline NP bouton density (average over TP2-4). NP presence was determined as the  
875 fraction of NP boutons that were present at each time point and these values were  
876 averaged for the first, second and third period of 5 TPs each. Changes in NP presence  
877 reflect changes in the density of NP bouton subgroups, as well as in bouton duration.  
878 However, differences in bouton duration (% of TPs present) of NP bouton subgroups  
879 were never observed in any of the conditions and we therefore only report NP bouton  
880 densities.

881

### 882 **Immunocytochemistry and confocal microscopy**

883 Fixation of the slices was performed in 4% paraformaldehyde (PFA) for 30 minutes at  
884 room temperature covered by aluminum foil. Following washing with phosphate-  
885 buffered saline (PBS; 3x 10 minutes), slices were permeabilized with 0.5% Triton X-100  
886 (15 minutes), followed by PBS washing (3x 5 minutes), and 1 hour incubation in  
887 blocking solution (0.2% Triton X-100 and 10% goat serum). Application of primary  
888 antibodies in blocking solution was performed overnight at 4 °C. After PBS washing (3x  
889 15 minutes), secondary antibodies were applied for 4 hours. After PBS washing (2x 15  
890 minutes), slices were mounted in Vectashield solution.

891

892 We used the following primary antibodies: rabbit  $\alpha$ -VGAT (Synaptic Systems, 131 003;  
893 1:1000), mouse  $\alpha$ -gephyrin (Synaptic Systems, 147 011; 1:1000), mouse  $\alpha$ -CB1R  
894 (Synaptic Systems, 258 011; 1:1000), rat  $\alpha$ -HA (Roche, 11 867 423 001; 1:500), and the  
895 following secondary antibodies: anti-mouse Alexa647 (Life Technologies, A21241, 1:500)  
896 and anti-rabbit Alexa405 (Life Technologies, A31556, 1:250) for VGAT and gephyrin  
897 staining, anti-mouse Alexa647 (Life Technologies, A21236, 1:500) and anti-mouse  
898 Alexa568 (Life Technologies, A11031, 1:500) for CB1R staining, and anti-rat Alexa568  
899 (Life Technologies, A11077, 1:500) for HA staining.

900

901 Confocal imaging was performed using a Zeiss LSM-700 microscope system with a 63x  
902 oil-immersion objective. A 20x objective was used to find back the two-photon imaging  
903 area based on the line scar. Image size was 101.3  $\mu\text{m}$  x 101.3  $\mu\text{m}$  (1024 x 1024 pixels)  
904 with 0.3  $\mu\text{m}$  z steps for synapse quantification, and up to 203  $\mu\text{m}$  x 203  $\mu\text{m}$  for post-  
905 hoc axon identification.

906 Confocal images were analyzed in Fiji and corresponding axons in the confocal and  
907 two-photon images were identified using the line scar as a guide. Expression of CB1R  
908 or HA was determined by visual inspection. In some cases, the image was mirrored to  
909 confirm or reject positive staining. Negative axons were always chosen close to positive  
910 axons in the same imaging area, assuring that the absence of CB1R or HA expression  
911 was not due to low immunostaining quality. In addition, we verified that CB1R  
912 expression or staining levels did not affect our conclusion as we found the same results  
913 when we split CB1R+ axons in two separate groups with high and low CB1R levels. Per  
914 slice, 2-6 axons per group were included in the analysis.

915 For synapse quantification images were analyzed in Fiji using a custom macro (Ruiter



916 et al., 2020). An average projection image was made from 5 z-planes, images were  
917 median filtered (1 pixel radius) and individual puncta were identified using watershed  
918 segmentation. VGAT and gephyrin puncta were analyzed separately and overlap was  
919 determined afterwards. Four independent experiments were performed with 1 or 2  
920 image areas per slice. To compare between treatments, data were normalized per  
921 experiment.

922

923

#### 924 **VGAT-Cre slice preparation and AAV virus injection**

925 Hippocampal slice cultures were prepared as described above from VGAT-Cre mice  
926 (JAX stock #028862) at 6-7 days after birth. Floxed AAV5 viruses (DIO-EGFP, #v115-1,  
927 DIO-Gs-HA, #v111-1; Viral Vector Facility, Zurich University) were applied at DIV1 on  
928 top of the hippocampal CA1 region by a microinjector (Eppendorf, FemtoJet) aided by  
929 a stereoscopic microscope (Leica, M80). This resulted in widespread, but sparse GFP  
930 and Gs-HA expression in GABAergic neurons, which partially overlapped. Two-photon  
931 time lapse imaging was performed when slices were kept 2 to 3 weeks *in vitro*. After a  
932 baseline period (5 time points), Gs signaling was activated by bath application of 10  
933  $\mu\text{M}$  CNO (Tocris Bioscience), which was continued until the end of the experiment.  
934 *Post hoc* immunostaining was performed using rat anti-HA primary antibodies (Roche,  
935 #11 867 423 001) and anti-rat Alexa568 (Life Technologies, A11077, 1:500) as  
936 secondary antibodies. We selected slices with good GFP labeling in the dendritic layer  
937 for the two-photon experiments and in 4 out of 13 slices we were able to identify up  
938 to 5 axons of each type within the imaging area. Identification of HA+ and HA- axons  
939 was performed in Fiji, bouton dynamics analysis in Matlab as described above.

940

#### 941 **Statistical Analysis**

942 All experiments were performed and analyzed blindly. Live imaging experiments for  
943 bouton dynamics analysis were performed in paired slices from the same animal and  
944 the same culture. Statistical analysis was performed using GraphPad Prism software.  
945 Data are reported as mean  $\pm$  standard error unless stated otherwise. The variance  
946 between axons was larger than the variance between slices, indicating that individual  
947 axons are independent measurements. Results from treatment and control  
948 experiments were compared using the nonparametric Mann-Whitney U test (MW).  
949 Distributions were compared with Kolmogorov-Smirnov test (KS). Multiple  
950 comparisons were made using two-way ANOVA (2w ANOVA) followed by Sidak's test.  
951 Repeated two-way ANOVA analysis was used for comparing NP bouton density and NP  
952 presence over time. P-values (not adjusted for multiplicity) are indicated in the figure  
953 legends. Differences were considered significant when  $p < 0.05$  (\* $p < 0.05$ , \*\* $p < 0.01$ ,  
954 \*\*\* $p < 0.001$ ).

955

## 956 References

- 957 Alger BE. 2002. Retrograde signaling in the regulation of synaptic transmission: Focus  
958 on endocannabinoids, *Progress in Neurobiology*. doi:10.1016/S0301-  
959 0082(02)00080-1
- 960 Alger BE, Kim J. 2011. Supply and demand for endocannabinoids. *Trends Neurosci*  
961 **34**:304–315. doi:10.1016/j.tins.2011.03.003
- 962 Antoni FA. 2012. New paradigms in cAMP signalling. *Mol Cell Endocrinol* **353**:3–9.  
963 doi:10.1016/j.mce.2011.10.034
- 964 Araque A, Castillo PE, Manzoni OJ, Tonini R. 2017. Synaptic functions of  
965 endocannabinoid signaling in health and disease. *Neuropharmacology* **124**:13–  
966 24. doi:10.1016/j.neuropharm.2017.06.017
- 967 Argaw A, Duff G, Zabouri N, Cécyre B, Chainé N, Cherif H, Tea N, Lutz B, Ptito M,  
968 Bouchard JF. 2011. Concerted action of CB1 cannabinoid receptor and deleted in  
969 colorectal cancer in axon guidance. *J Neurosci* **31**:1489–1499.  
970 doi:10.1523/JNEUROSCI.4134-09.2011
- 971 Argyrousi EK, Heckman PRA, Prickaerts J. 2020. Role of cyclic nucleotides and their  
972 downstream signaling cascades in memory function : Being at the right time at  
973 the right spot. *Neurosci Biobehav Rev* **113**:12–38.  
974 doi:10.1016/j.neubiorev.2020.02.004
- 975 Bacci A, Huguenard JR, Prince DA. 2004. Long-lasting self-inhibition of neocortical  
976 interneurons mediated by endocannabinoids. *Nature* **431**:1–5.  
977 doi:10.1038/nature02782.1.
- 978 Bailey CH, Chen M. 1989. Time course of structural changes at identified sensory  
979 neuron synapses during long-term sensitization in *Aplysia*. *J Neurosci* **9**:1774–  
980 1780. doi:10.1523/jneurosci.09-05-01774.1989
- 981 Bailey CH, Kandel ER. 1993. Structural changes accompanying memory storage. *Annu*  
982 *Rev Physiol* **55**:397–426. doi:10.1146/annurev.ph.55.030193.002145
- 983 Baillie GS. 2009. Compartmentalized signalling: Spatial regulation of cAMP by the  
984 action of compartmentalized phosphodiesterases. *FEBS J*. doi:10.1111/j.1742-  
985 4658.2009.06926.x
- 986 Bednarek E, Caroni P. 2011. B-Adducin Is Required for Stable Assembly of New  
987 Synapses and Improved Memory Upon Environmental Enrichment. *Neuron*  
988 **69**:1132–1146. doi:10.1016/j.neuron.2011.02.034
- 989 Bekkers JM, Clements JD. 1999. Quantal amplitude and quantal variance of strontium-  
990 induced asynchronous EPSCs in rat dentate granule neurons. *J Physiol* **516**:227–  
991 248. doi:10.1111/j.1469-7793.1999.227aa.x
- 992 Berghuis P, Rajnicek AM, Morozov YM, Ross RA, Mulder J, Urban GM, Monory K,  
993 Marsicano G, Matteoli M, Canty A, Lving AJ, Katona I, Yanagawa Y, Rakic P, Lutz B,  
994 Mackie K, Harkany T. 2007. Hardwiring the Brain: Endocannabinoids Shape  
995 Neuronal Connectivity. *Science (80- )* **316**:1212–1216.

- 996 Bernier L-P, Bohlen CJ, York EM, Choi HB, Kamyabi A, Dissing-Olesen L, Hefendehl JK,  
997 Collins HY, Stevens B, Barres BA, MacVicar BA. 2019. Nanoscale Surveillance of  
998 the Brain by Microglia via cAMP-Regulated Filopodia. *Cell Rep* **27**:2895–2908.  
999 doi:10.1016/j.celrep.2019.05.010
- 1000 Bonilla-Del Río I, Puente N, Mimenza A, Ramos A, Serrano M, Lekunberri L,  
1001 Gerrikagoitia I, Christie BR, Nahirney PC, Grandes P. 2021. Acute  $\Delta^9$  -  
1002 tetrahydrocannabinol prompts rapid changes in cannabinoid CB 1 receptor  
1003 immunolabeling and subcellular structure in CA1 hippocampus of young adult  
1004 male mice. *J Comp Neurol* 10.1002/cne.25098. Online ahead of print.  
1005 doi:10.1002/cne.25098
- 1006 Bourne JN, Harris KM. 2011. Coordination of size and number of excitatory and  
1007 inhibitory synapses results in a balanced structural plasticity along mature  
1008 hippocampal CA1 dendrites during LTP. *Hippocampus* **21**:354–373.  
1009 doi:10.1002/hipo.20768
- 1010 Caballero-Florán RN, Conde-Rojas I, Oviedo Chávez A, Cortes-Calleja H, Lopez-Santiago  
1011 LF, Isom LL, Aceves J, Erlj D, Florán B. 2016. Cannabinoid-induced depression of  
1012 synaptic transmission is switched to stimulation when dopaminergic tone is  
1013 increased in the globus pallidus of the rodent. *Neuropharmacology* **110**:407–418.  
1014 doi:10.1016/j.neuropharm.2016.08.002
- 1015 Campbell AP, Smrcka A V. 2018. Targeting G protein-coupled receptor signalling by  
1016 blocking G proteins. *Nat Rev Drug Discov* **17**:789–803. doi:10.1038/nrd.2018.135
- 1017 Caroni P, Donato F, Muller D. 2012. Structural plasticity upon learning: regulation and  
1018 functions. *Nat Rev Neurosci* **13**:478–490. doi:10.1038/nrn3258
- 1019 Castillo PE, Younts TJ, Chávez AE, Hashimoto-dani Y. 2012. Endocannabinoid signaling  
1020 and synaptic function. *Neuron* **76**:70–81. doi:10.1016/j.neuron.2012.09.020
- 1021 Chen SX, Kim AN, Peters AJ, Komiyama T. 2015. Subtype-specific plasticity of inhibitory  
1022 circuits in motor cortex during motor learning. *Nat Neurosci* **18**:1109–1115.  
1023 doi:10.1038/nn.4049
- 1024 Chenouard N, Xuan F, Tsien RW. 2020. Synaptic vesicle traffic is supported by transient  
1025 actin filaments and regulated by PKA and NO. *Nat Commun* **11**.  
1026 doi:10.1038/s41467-020-19120-1
- 1027 Chevaleyre V, Castillo PE. 2003. Heterosynaptic LTD of hippocampal GABAergic  
1028 synapses: A novel role of endocannabinoids in regulating excitability. *Neuron*  
1029 **38**:461–472. doi:10.1016/S0896-6273(03)00235-6
- 1030 Chevaleyre V, Heifets BD, Kaeser PS, Südhof TC, Purpura DP, Castillo PE. 2007.  
1031 Endocannabinoid-Mediated Long-Term Plasticity Requires cAMP/PKA Signaling  
1032 and RIM1 $\alpha$ . *Neuron* **54**:801–812. doi:10.1016/j.neuron.2007.05.020
- 1033 Chia PH, Chen B, Li P, Rosen MK, Shen K. 2014. Local F-actin network links synapse  
1034 formation and axon branching. *Cell* **156**:208–220. doi:10.1016/j.cell.2013.12.009
- 1035 Chia PH, Li P, Shen K. 2013. Cellular and molecular mechanisms underlying presynapse  
1036 formation. *J Cell Biol* **203**:11–22. doi:10.1083/jcb.201307020
- 1037 Chiu CQ, Barberis A, Higley MJ. 2019. Preserving the balance: diverse forms of long-

- 1038 term GABAergic synaptic plasticity. *Nat Rev Neurosci* **20**:272–281.  
1039 doi:10.1038/s41583-019-0141-5
- 1040 Cox DJ, Racca C, LeBeau FEN. 2008. B-Adrenergic Receptors Are Differentially  
1041 Expressed in Distinct Interneuron Subtypes in the Rat Hippocampus. *J Comp*  
1042 *Neurol* **509**:551–565. doi:10.1002/cne.21758
- 1043 Cui Y, Paille V, Xu H, Genet S, Delord B, Fino E, Berry H, Venance L. 2015.  
1044 Endocannabinoids mediate bidirectional striatal spike-timing-dependent  
1045 plasticity. *J Physiol* **593**:2833–2849. doi:10.1113/JP270324
- 1046 Cui Y, Prokin I, Xu H, Delord B, Genet S, Venance L, Berry H. 2016. Endocannabinoid  
1047 dynamics gate spike-timing dependent depression and potentiation. *Elife* **5**:1–32.  
1048 doi:10.7554/eLife.13185
- 1049 Danglot L, Triller A, Bessis A. 2003. Association of gephyrin with synaptic and  
1050 extrasynaptic GABAA receptors varies during development in cultured  
1051 hippocampal neurons. *Mol Cell Neurosci* **23**:264–278. doi:10.1016/S1044-  
1052 7431(03)00069-1
- 1053 De Simoni A, Griesinger CB, Edwards FA. 2003. Development of rat CA1 neurones in  
1054 acute versus organotypic slices: role of experience in synaptic morphology and  
1055 activity. *J Physiol* **550**:135–47. doi:10.1113/jphysiol.2003.039099
- 1056 Dobie FA, Craig AM. 2011. Inhibitory synapse dynamics: coordinated presynaptic and  
1057 postsynaptic mobility and the major contribution of recycled vesicles to new  
1058 synapse formation. *J Neurosci* **31**:10481–10493. doi:10.1523/JNEUROSCI.6023-  
1059 10.2011
- 1060 Dócs K, Mészár Z, Gonda S, Kiss-Szikszai A, Holló K, Antal M, Hegyi Z. 2017. The ratio of  
1061 2-AG to its isomer 1-AG as an intrinsic fine tuning mechanism of CB1 receptor  
1062 activation. *Front Cell Neurosci* **11**:1–13. doi:10.3389/fncel.2017.00039
- 1063 Donato F, Chowdhury A, Lahr M, Caroni P. 2015. Early- and Late-Born Parvalbumin  
1064 Basket Cell Subpopulations Exhibiting Distinct Regulation and Roles in Learning.  
1065 *Neuron* **85**:770–786. doi:10.1016/j.neuron.2015.01.011
- 1066 Donato F, Rompani SB, Caroni P. 2013. Parvalbumin-expressing basket-cell network  
1067 plasticity induced by experience regulates adult learning. *Nature* **504**:272–276.  
1068 doi:10.1038/nature12866
- 1069 Dudok B, Barna L, Ledri M, Szabó SI, Szabadits E, Pintér B, Woodhams SG, Henstridge  
1070 CM, Balla GY, Nyilas R, Varga C, Lee S-H, Matolcsi M, Cervenak J, Kacs Kovics I,  
1071 Watanabe M, Sagheddu C, Melis M, Pistis M, Soltesz I, Katona I. 2015. Cell-specific  
1072 STORM super-resolution imaging reveals nanoscale organization of cannabinoid  
1073 signaling. *Nat Neurosci* **18**:75–86. doi:10.1038/nn.3892
- 1074 Eldeeb K, Leone-kabler S, Howlett AC. 2016. CB1 cannabinoid receptor-mediated  
1075 increases in cyclic AMP accumulation are correlated with reduced Gi/o function.  
1076 *J Basic Clin Physiol Pharmacol* **27**:311–322. doi:10.1515/jbcpp-2015-0096.CB
- 1077 Fernandes HB, Riordan S, Nomura T, Remmers CL, Kraniotis S, Marshall JJ, Kukreja L,  
1078 Vassar R, Contractor A. 2015. Epac2 mediates cAMP-dependent potentiation of  
1079 neurotransmission in the hippocampus. *J Neurosci* **35**:6544–6553.

- 1080 doi:10.1523/JNEUROSCI.0314-14.2015
- 1081 Finlay DB, Cawston EE, Grimsey NL, Hunter MR, Korde A, Vemuri VK, Makriyannis A,  
1082 Glass M. 2017. Gas signalling of the CB1 receptor and the influence of receptor  
1083 number. *Br J Pharmacol* **174**:2545–2562. doi:10.1111/bph.13866
- 1084 Flores-Otero J, Ahn KH, Delgado-Peraza F, Mackie K, Kendall DA, Yudowski GA. 2014.  
1085 Ligand-specific endocytic dwell times control functional selectivity of the  
1086 cannabinoid receptor 1. *Nat Commun* **5**:1–11. doi:10.1038/ncomms5589
- 1087 Flores CE, Méndez P. 2014. Shaping inhibition: activity dependent structural plasticity  
1088 of GABAergic synapses. *Front Cell Neurosci* **8**:1–13.  
1089 doi:10.3389/fncel.2014.00327
- 1090 Frias CP, Liang J, Bresser T, Scheefhals L, van Kesteren M, Dorland R van, Hu HY, Bodzeta  
1091 A, Van Bergen en Henegouwen PMP, Hoogenraad CC, Wierenga CJ. 2019.  
1092 Semaphorin4D induces inhibitory synapse formation by rapid stabilization of  
1093 presynaptic boutons via MET co-activation. *J Neurosci* **39**:4221–4237.
- 1094 Gekel I, Neher E. 2008. Application of an Epac activator enhances neurotransmitter  
1095 release at excitatory central synapses. *J Neurosci* **28**:7991–8002.  
1096 doi:10.1523/JNEUROSCI.0268-08.2008
- 1097 Glass M, Felder CC. 1997. Concurrent stimulation of cannabinoid CB1 and dopamine  
1098 D2 receptors augments cAMP accumulation in striatal neurons: evidence for a Gs  
1099 linkage to the CB1 receptor. *J Neurosci* **17**:5327–5333.  
1100 doi:10.1523/JNEUROSCI.17-14-05327.1997
- 1101 Gonzalez-Burgos G, Miyamae T, Pafundo DE, Yoshino H, Rotaru DC, Hoftman G, Datta  
1102 D, Zhang Y, Hammond M, Sampson AR, Fish KN, Ermentrout GB, Lewis DA. 2015.  
1103 Functional maturation of GABA synapses during postnatal development of the  
1104 monkey dorsolateral prefrontal cortex. *Cereb Cortex* **25**:4076–4093.  
1105 doi:10.1093/cercor/bhu122
- 1106 Guggenhuber S, Alpar A, Chen R, Schmitz N, Wickert M, Mattheus T, Harasta AE, Purrio  
1107 M, Kaiser N, Elphick MR, Monory K, Kilb W, Luhmann HJ, Harkany T, Lutz B,  
1108 Klugmann M. 2016. Cannabinoid receptor-interacting protein Crip1a modulates  
1109 CB1 receptor signaling in mouse hippocampus. *Brain Struct Funct* **221**:2061–2074.  
1110 doi:10.1007/s00429-015-1027-6
- 1111 Guo J, Ikeda SR. 2004. Endocannabinoids modulate N-type calcium channels and G-  
1112 protein-coupled inwardly rectifying potassium channels via CB1 cannabinoid  
1113 receptors heterologously expressed in mammalian neurons. *Mol Pharmacol*  
1114 **65**:665–674. doi:doi: 10.1124/mol.65.3.665
- 1115 Hashimotodani Y, Ohno-shosaku T, Kano M. 2007. Ca<sup>2+</sup>-assisted receptor-driven  
1116 endocannabinoid release: mechanisms that associate presynaptic and  
1117 postsynaptic activities. *Curr Opin Neurobiol* **17**:360–365.  
1118 doi:10.1016/j.conb.2007.03.012
- 1119 Hashimotodani Y, Ohno-Shosaku T, Tanimura A, Kita Y, Sano Y, Shimizu T, Di Marzo V,  
1120 Kano M. 2013. Acute inhibition of diacylglycerol lipase blocks endocannabinoid-  
1121 mediated retrograde signalling: Evidence for on-demand biosynthesis of 2-

- 1122 arachidonoylglycerol. *J Physiol* **591**:4765–4776.  
1123 doi:10.1113/jphysiol.2013.254474
- 1124 Hattori R, Kuchibhotla K V., Froemke RC, Komiyama T. 2017. Functions and  
1125 dysfunctions of neocortical inhibitory neuron subtypes. *Nat Neurosci* **20**:1199–  
1126 1208. doi:10.1038/nn.4619
- 1127 Hebert-Chatelain E, Desprez T, Serrat R, Bellocchio L, Soria-Gomez E, Busquets-Garcia  
1128 A, Pagano Zottola AC, Delamarre A, Cannich A, Vincent P, Varilh M, Robin LM,  
1129 Terral G, García-Fernández MD, Colavita M, Mazier W, Drago F, Puente N, Reguero  
1130 L, Elezgarai I, Dupuy JW, Cota D, Lopez-Rodriguez ML, Barreda-Gómez G, Massa F,  
1131 Grandes P, Bénard G, Marsicano G. 2016. A cannabinoid link between  
1132 mitochondria and memory. *Nature* **539**:555–559. doi:10.1038/nature20127
- 1133 Helboe L, Egebjerg J, de Jong IEM. 2015. Distribution of serotonin receptor 5-HT6  
1134 mRNA in rat neuronal subpopulations: A double in situ hybridization study.  
1135 *Neuroscience* **310**:442–454. doi:10.1016/j.neuroscience.2015.09.064
- 1136 Herstel LJ, Wierenga CJ. 2021. Network control through coordinated inhibition. *Curr*  
1137 *Opin Neurobiol* **67**:34–41. doi:10.1016/j.conb.2020.08.001
- 1138 Hofer SB, Mrcic-Flogel TD, Bonhoeffer T, Hübener M. 2009. Experience leaves a lasting  
1139 structural trace in cortical circuits. *Nature* **457**:313–317.  
1140 doi:10.1038/nature07487
- 1141 Hu HY, Kruijssen DL, Frias CP, Rózsa B, Hoogenraad CC, Wierenga CJ. 2019.  
1142 Endocannabinoid signaling mediates local dendritic coordination between  
1143 excitatory and inhibitory synapses. *Cell Rep* **27**:666–675.
- 1144 Ibsen MS, Connor M, Glass M. 2017. Cannabinoid CB 1 and CB 2 Receptor Signaling  
1145 and Bias . *Cannabis Cannabinoid Res* **2**:48–60. doi:10.1089/can.2016.0037
- 1146 Jiang X, Sando R, Südhof TC. 2021. Multiple signaling pathways are essential for  
1147 synapse formation induced by synaptic adhesion molecules. *Proc Natl Acad Sci U*  
1148 *S A* **118**. doi:10.1073/pnas.2000173118
- 1149 Jullié D, Stoeber M, Sibarita J, Zieger HL, Bartol TM, Arttamangkul S, Sejnowski TJ, Hosy  
1150 E, von Zastrow M. 2020. A Discrete Presynaptic Vesicle Cycle for Neuromodulator  
1151 Receptors. *Neuron* **105**:1–15. doi:10.1016/j.neuron.2019.11.016
- 1152 Kano M, Ohno-Shosaku T, Hashimoto-dani Y, Watanabe MUM. 2009. Endocannabinoid-  
1153 mediated control of synaptic transmission. *Physiol Rev* **89**:309–380.  
1154 doi:10.1152/physrev.00019.2008.
- 1155 Katona I, Freund TF. 2012. Multiple functions of endocannabinoid signaling in the brain.  
1156 *Annu Rev Neurosci* **35**:529–558. doi:10.1146/annurev-neuro-062111-150420
- 1157 Katona I, Sperlách B, Sík A, Káfalvi A, Vizi ES, Mackie K, Freund TF. 1999. Presynaptically  
1158 located CB1 cannabinoid receptors regulate GABA release from axon terminals of  
1159 specific hippocampal interneurons. *J Neurosci* **19**:4544–4558.  
1160 doi:10.1523/jneurosci.19-11-04544.1999
- 1161 Katona I, Urban GM, Wallace M, Ledent C, Jung K-M, Piomelli D, Mackie K, Freund TF.  
1162 2006. Molecular Composition of the Endocannabinoid System at Glutamatergic  
1163 Synapses. *J Neurosci* **26**:5628–5637. doi:10.1523/JNEUROSCI.0309-06.2006

- 1164 Kawasaki H, Springett GM, Mochizuki N, Toki S, Nakaya M, Matsuda M, Housman DE,  
1165 Graybiel AM. 1998. A family of cAMP-binding proteins that directly activate Rap1.  
1166 *Science (80- )* **282**:2275–2279. doi:10.1126/science.282.5397.2275
- 1167 Keck T, Scheuss V, Jacobsen RI, Wierenga CJ, Eysel UT, Bonhoeffer T, Hübener M. 2011.  
1168 Loss of sensory input causes rapid structural changes of inhibitory neurons in  
1169 adult mouse visual cortex. *Neuron* **71**:869–882.  
1170 doi:10.1016/j.neuron.2011.06.034
- 1171 Kirchner JH, Gjorgjieva J. 2019. A unifying framework for synaptic organization on  
1172 cortical dendrites. *bioRxiv* 1–21. doi:10.1101/771907
- 1173 Kleindienst T, Winnubst J, Roth-alpermann C, Bonhoeffer T, Lohmann C. 2011. Activity-  
1174 Dependent Clustering of Functional Synaptic Inputs on Developing Hippocampal  
1175 Dendrites. *Neuron* **72**:1012–1024. doi:10.1016/j.neuron.2011.10.015
- 1176 Knott GW, Quairiaux C, Genoud C, Welker E. 2002. Formation of dendritic spines with  
1177 GABAergic synapses induced by whisker stimulation in adult mice. *Neuron*  
1178 **34**:265–273.
- 1179 Koon AC, Ashley J, Barria R, Dasgupta S, Brain R, Waddell S, Alkema MJ. 2011.  
1180 Autoregulatory and paracrine control of synaptic and behavioral plasticity by  
1181 octopaminergic signaling. *Nat Neurosci* **14**:190–199. doi:10.1038/nn.2716
- 1182 Kozorovitskiy Y, Saunders A, Johnson CA, Lowell BB, Sabatini BL. 2012. Recurrent  
1183 network activity drives striatal synaptogenesis. *Nature* **485**:646–650.  
1184 doi:10.1038/nature11052
- 1185 Laprairie RB, Bagher AM, Denovan-Wright EM. 2017. Cannabinoid receptor ligand bias:  
1186 implications in the central nervous system. *Curr Opin Pharmacol*.  
1187 doi:10.1016/j.coph.2016.10.005
- 1188 Lauckner JE, Hille B, Mackie K. 2005. The cannabinoid agonist WIN55,212-2 increases  
1189 intracellular calcium via CB1 receptor coupling to Gq/11 G proteins. *Proc Natl*  
1190 *Acad Sci U S A* **102**:19144–19149. doi:10.1073/pnas.0509588102
- 1191 Lazarus MS, Josh Huang Z. 2011. Distinct maturation profiles of perisomatic and  
1192 dendritic targeting GABAergic interneurons in the mouse primary visual cortex  
1193 during the critical period of ocular dominance plasticity. *J Neurophysiol* **106**:775–  
1194 787. doi:10.1152/jn.00729.2010
- 1195 Lee SH, Ledri M, Tóth B, Marchionni I, Henstridge CM, Dudok B, Kenesei K, Barna L,  
1196 Szabó SI, Renkecz T, Oberoi M, Watanabe M, Limoli CL, Horvai G, Soltesz I, Katona  
1197 I. 2015. Multiple forms of endocannabinoid and endovanilloid signaling regulate  
1198 the tonic control of GABA release. *J Neurosci* **35**:10039–10057.  
1199 doi:10.1523/JNEUROSCI.4112-14.2015
- 1200 Lee SS-H, Földy C, Soltesz I. 2010. Distinct Endocannabinoid Control of GABA Release  
1201 at Perisomatic and Dendritic Synapses in the Hippocampus. *J Neurosci* **30**:7993–  
1202 8000. doi:10.1523/JNEUROSCI.6238-09.2010
- 1203 Lenkey N, Kirizis T, Holderith N, Mláte Z, Szabó G, Vizi ES, Hájos N, Nusser Z. 2015. Tonic  
1204 endocannabinoid-mediated modulation of GABA release is independent of the  
1205 CB1 content of axon terminals. *Nat Commun* **6**:6557. doi:10.1038/ncomms7557

- 1206 Lewis DA, Hashimoto T, Volk DW. 2005. Cortical inhibitory neurons and schizophrenia.  
1207 *Nat Rev Neurosci* **6**:312–324. doi:10.1038/nrn1648
- 1208 López-Bendito G, Sturgess K, Erdélyi F, Szabó G, Molnár Z, Paulsen O. 2004. Preferential  
1209 origin and layer destination of GAD65-GFP cortical interneurons. *Cereb Cortex*  
1210 **14**:1122–1133. doi:10.1093/cercor/bhh072
- 1211 Lovinger DM. 2008. Presynaptic modulation by endocannabinoids. *Handb Exp*  
1212 *Pharmacol* **184**:435–477. doi:10.1007/978-3-540-74805-2\_14
- 1213 Maffei A, Charrier C, Caiati MD, Barberis A, Mahadevan V, Woodin MA, Tyagarajan SK.  
1214 2017. Emerging mechanisms underlying dynamics of GABAergic synapses. *J*  
1215 *Neurosci* **37**:10792–10799. doi:10.1523/JNEUROSCI.1824-17.2017
- 1216 Maiellaro I, Lohse MJ, Kittel RJ, Calebiro D. 2016. cAMP Signals in Drosophila Motor  
1217 Neurons Are Confined to Single Synaptic Boutons. *Cell Rep* **17**:1238–1246.  
1218 doi:10.1016/j.celrep.2016.09.090
- 1219 Maroso M, Szabo GG, Kim HK, Alexander A, Bui AD, Lee SH, Lutz B, Soltesz I. 2016.  
1220 Cannabinoid Control of Learning and Memory through HCN Channels. *Neuron*  
1221 **89**:1059–1073. doi:10.1016/j.neuron.2016.01.023
- 1222 Martín R, García-Font N, Suárez-Pinilla AS, Bartolomé-Martín D, Ferrero JJ, Luján R,  
1223 Torres M, Sánchez-Prieto J. 2020.  $\beta$ -adrenergic receptors/epac signaling increases  
1224 the size of the readily releasable pool of synaptic vesicles required for parallel  
1225 fiber LTP. *J Neurosci* **40**:8604–8617. doi:10.1523/JNEUROSCI.0716-20.2020
- 1226 Mikasova L, Groc L, Choquet D, Manzoni OJ. 2008. Altered surface trafficking of  
1227 presynaptic cannabinoid type 1 receptor in and out synaptic terminals parallels  
1228 receptor desensitization. *Proc Natl Acad Sci U S A* **105**:18596–18601.  
1229 doi:10.1073/pnas.0805959105
- 1230 Mitoma H, Konishi S. 1996. Long-lasting facilitation of inhibitory transmission by  
1231 monoaminergic and cAMP-dependent mechanism in rat cerebellar GABAergic  
1232 synapses. *Neurosci Lett* **217**:141–144. doi:10.1016/0304-3940(96)13090-1
- 1233 Monday H, Bourdenx M, Jordan B, Castillo P. 2020. CB 1 receptor-mediated inhibitory  
1234 LTD triggers presynaptic remodeling via protein synthesis and ubiquitination. *Elife*  
1235 **9**:e54812. doi:10.1101/2020.01.09.900464
- 1236 Monday HR, Castillo PE. 2017. Closing the gap: long-term presynaptic plasticity in brain  
1237 function and disease. *Curr Opin Neurobiol* **45**:106–112.  
1238 doi:<https://doi.org/10.1016/j.conb.2017.05.011>
- 1239 Mullins C, Fishell G, Tsien RW. 2016. Unifying Views of Autism Spectrum Disorders: A  
1240 Consideration of Autoregulatory Feedback Loops. *Neuron* **89**:1131–1156.  
1241 doi:10.1016/j.neuron.2016.02.017
- 1242 Navarrete M, Díez A, Araque A. 2014. Astrocytes in endocannabinoid signalling. *Philos*  
1243 *Trans R Soc B Biol Sci* **369**. doi:10.1098/rstb.2013.0599
- 1244 Nazif FA, Byrne JH, Cleary LJ. 1991. cAMP induces long-term morphological changes in  
1245 sensory neurons of Aplysia. *Brain Res* **539**:324–327. doi:10.1016/0006-  
1246 8993(91)91638-H
- 1247 Nguyen QA, Horn ME, Nicoll RA. 2016. Distinct roles for extracellular and intracellular



- 1248 domains in neuroligin function at inhibitory synapses. *Elife* **5**:e19236.  
1249 doi:10.7554/eLife.19236
- 1250 Niculescu D, Michaelsen-Preusse K, Güner Ü, van Dorland R, Wierenga CJ, Lohmann C.  
1251 2018. A BDNF-Mediated Push-Pull Plasticity Mechanism for Synaptic Clustering.  
1252 *Cell Rep* **24**:2063–2074. doi:10.1016/j.celrep.2018.07.073
- 1253 Nishiyama J, Yasuda R. 2015. Biochemical Computation for Spine Structural Plasticity.  
1254 *Neuron* **87**:63–75. doi:10.1016/j.neuron.2015.05.043
- 1255 Niwa F, Bannai H, Arizono M, Fukatsu K, Triller A, Mikoshiba K. 2012. Gephyrin-  
1256 independent GABA(A)R mobility and clustering during plasticity. *PLoS One*  
1257 **7**:e36148. doi:10.1371/journal.pone.0036148
- 1258 Njoo C, Agarwal N, Lutz B, Kuner R. 2015. The Cannabinoid Receptor CB1 Interacts with  
1259 the WAVE1 Complex and Plays a Role in Actin Dynamics and Structural Plasticity  
1260 in Neurons. *PLoS Biol* **13**:e1002286. doi:10.1371/journal.pbio.1002286
- 1261 Nogueras-Ortiz C, Yudowski GA. 2016. The multiple waves of cannabinoid 1 receptor  
1262 signaling. *Mol Pharmacol* **90**:620–626. doi:10.1124/mol.116.104539
- 1263 Oh WC, Lutz S, Castillo PE, Kwon H. 2016. De novo synaptogenesis induced by GABA  
1264 in the developing mouse cortex. *Science (80- )* **353**:1037–1040.
- 1265 Pardo GVE, Lucion AB, Calcagnotto ME. 2018. Postnatal development of inhibitory  
1266 synaptic transmission in the anterior piriform cortex. *Int J Dev Neurosci* **71**:1–9.  
1267 doi:10.1016/j.ijdevneu.2018.07.008
- 1268 Patrizi A, Scelfo B, Viltono L, Briatore F, Fukaya M, Watanabe M, Strata P, Varoqueaux  
1269 F, Brose N, Fritschy J, Sassoè-Pognetto M, Sassoè M. 2008. Synapse formation and  
1270 clustering of neuroligin-2 in the absence of GABAA receptors. *Proc Natl Acad Sci*  
1271 *U S A* **105**:13151–13156. doi:10.1073/pnas.0802390105
- 1272 Patzke C, Brockmann MM, Dai J, Gan KJ, Grauel MK, Fenske P, Liu Y, Acuna C,  
1273 Rosenmund C, Südhof TC. 2019. Neuromodulator Signaling Bidirectionally  
1274 Controls Vesicle Numbers in Human Synapses. *Cell* **179**:498–513.  
1275 doi:10.1016/j.cell.2019.09.011
- 1276 Pielage J, Bulat V, Zuchero JB, Fetter RD, Davis GW. 2011. Hts/adducin controls synaptic  
1277 elaboration and elimination. *Neuron* **69**:1114–1131.  
1278 doi:10.1016/j.neuron.2011.02.007
- 1279 Piomelli D. 2014. More surprises lying ahead. The endocannabinoids keep us guessing.  
1280 *Neuropharmacology* **76**:228–234. doi:10.1016/j.neuropharm.2013.07.026
- 1281 Puighermanal E, Cutando L, Boubaker-Vitre J, Honoré E, Longueville S, Hervé D, Valjent  
1282 E. 2017. Anatomical and molecular characterization of dopamine D1 receptor-  
1283 expressing neurons of the mouse CA1 dorsal hippocampus. *Brain Struct Funct*  
1284 **222**:1897–1911. doi:10.1007/s00429-016-1314-x
- 1285 Rall W. 1967. Distinguishing theoretical synaptic potentials computed for different  
1286 soma-dendritic distributions of synaptic input. *J Neurophysiol* **30**:1138–1168.  
1287 doi:10.1152/jn.1967.30.5.1138
- 1288 Roland AB, Ricobaraza A, Carrel D, Jordan BM, Rico F, Simon A, Humbert-Claude M,  
1289 Ferrier J, McFadden MH, Scheuring S, Lenkei Z. 2014. Cannabinoid-induced

- 1290 actomyosin contractility shapes neuronal morphology and growth. *Elife* **3**:e03159.  
1291 doi:10.7554/eLife.03159
- 1292 Roth BL. 2016. DREADDs for Neuroscientists. *Neuron* **89**:683–694.  
1293 doi:10.1016/j.neuron.2016.01.040
- 1294 Ruediger S, Vittori C, Bednarek E, Genoud C, Strata P, Sacchetti B, Caroni P. 2011.  
1295 Learning-related feedforward inhibitory connectivity growth required for  
1296 memory precision. *Nature* **473**:514–518. doi:10.1038/nature09946
- 1297 Ruiten M, Herstel LJ, Wierenga CJ. 2020. Reduction of dendritic inhibition in CA1  
1298 pyramidal neurons in amyloidosis models of early Alzheimer’s disease. *J*  
1299 *Alzheimer’s Dis* **78**:951–964.
- 1300 Ruiten M, Lützkendorf C, Liang J, Wierenga CJ. 2021. Amyloid- $\beta$  Oligomers Induce Only  
1301 Mild Changes to Inhibitory Bouton Dynamics. *J Alzheimer’s Dis Reports* in press.  
1302 doi:10.3233/ADR-200291
- 1303 Savinainen JR, Saario SM, Laitinen JT. 2012. The serine hydrolases MAGL, ABHD6 and  
1304 ABHD12 as guardians of 2-arachidonoylglycerol signalling through cannabinoid  
1305 receptors. *Acta Physiol* **204**:267–276. doi:10.1111/j.1748-1716.2011.02280.x
- 1306 Scholl B, Thomas CI, Ryan MA, Kamasawa N, Fitzpatrick D. 2020. Cortical neuron  
1307 response selectivity derives from strength in numbers of synapses. *Nature*.  
1308 doi:10.1101/2019.12.24.887422
- 1309 Schuemann A, Klawiter A, Bonhoeffer T, Wierenga CJ. 2013. Structural plasticity of  
1310 GABAergic axons is regulated by network activity and GABAA receptor activation.  
1311 *Front Neural Circuits* **7**:1–16. doi:10.3389/fncir.2013.00113
- 1312 Sholler DJ, Huestis MA, Amendolara B, Vandrey R, Cooper ZD. 2020. Therapeutic  
1313 potential and safety considerations for the clinical use of synthetic cannabinoids.  
1314 *Pharmacol Biochem Behav*. doi:10.1016/j.pbb.2020.173059
- 1315 Szabó GG, Lenkey N, Holderith N, András T, Nusser Z, Hájos N. 2014. Presynaptic  
1316 calcium channel inhibition underlies CB1 cannabinoid receptor-mediated  
1317 suppression of GABA release. *J Neurosci* **34**:7958–7963.  
1318 doi:10.1523/JNEUROSCI.0247-14.2014
- 1319 Tang X, Jaenisch R, Sur M. 2021. The role of GABAergic signalling in  
1320 neurodevelopmental disorders. *Nat Rev Neurosci* **3**:in press. doi:10.1038/s41583-  
1321 021-00443-x
- 1322 Taylor SS, Zhang P, Steichen JM, Keshwani MM, Kornev AP. 2013. PKA: Lessons learned  
1323 after twenty years. *Biochim Biophys Acta - Proteins Proteomics* **1834**:1271–1278.  
1324 doi:10.1016/j.bbapap.2013.03.007
- 1325 Tillo SE, Xiong WH, Takahashi M, Miao S, Andrade AL, Fortin DA, Yang G, Qin M,  
1326 Smoody BF, Stork PJS, Zhong H. 2017. Liberated PKA Catalytic Subunits Associate  
1327 with the Membrane via Myristoylation to Preferentially Phosphorylate  
1328 Membrane Substrates. *Cell Rep* **19**:617–629. doi:10.1016/j.celrep.2017.03.070
- 1329 Upreti C, Konstantinov E, Kassabov SR, Bailey CH, Kandel ER. 2019. Serotonin Induces  
1330 Structural Plasticity of Both Extrinsic Modulating and Intrinsic Mediating Circuits  
1331 In Vitro in Aplysia Californica. *Cell Rep* **28**:2955-2965.e3.

- 1332 doi:10.1016/j.celrep.2019.08.016
- 1333 Urban DJ, Roth BL. 2015. DREADDs (Designer Receptors Exclusively Activated by  
1334 Designer Drugs): Chemogenetic Tools with Therapeutic Utility. *Annu Rev*  
1335 *Pharmacol Toxicol* **55**:399–417. doi:10.1146/annurev-pharmtox-010814-124803
- 1336 Villa KL, Berry KP, Subramanian J, Cha JW, Oh WC, Kwon H-B, Kubota Y, So PTC, Nedivi  
1337 E. 2016. Inhibitory synapses are repeatedly assembled and removed at persistent  
1338 sites in vivo. *Neuron* **89**:756–769. doi:10.1016/j.neuron.2016.01.010
- 1339 Wang W, Jia Y, Pham DT, Palmer LC, Jung K-M, Cox CD, Rumbaugh G, Piomelli D, Gall  
1340 CM, Lynch G. 2017. Atypical endocannabinoid signaling initiates a new form of  
1341 memory-related plasticity at a cortical input to hippocampus. *Cereb Cortex* 1–14.  
1342 doi:10.1093/cercor/bhx126
- 1343 Wierenga CJ. 2017. Live imaging of inhibitory axons: Synapse formation as a dynamic  
1344 trial-and-error process. *Brain Res Bull* **129**:43–49.  
1345 doi:10.1016/j.brainresbull.2016.09.018
- 1346 Wierenga CJ, Becker N, Bonhoeffer T. 2008. GABAergic synapses are formed without  
1347 the involvement of dendritic protrusions. *Nat Neurosci* **11**:1044–1052.  
1348 doi:10.1038/nn.2180
- 1349 Wierenga CJ, Müllner FE, Rinke I, Keck T, Stein V, Bonhoeffer T. 2010. Molecular and  
1350 electrophysiological characterization of GFP-expressing CA1 interneurons in  
1351 GAD65-GFP mice. *PLoS One* **5**:e15915. doi:10.1371/journal.pone.0015915
- 1352 Wierenga CJ, Wadman WJ. 1999. Miniature inhibitory postsynaptic currents in CA1  
1353 pyramidal neurons after kindling epileptogenesis. *J Neurophysiol* **82**:1352–1362.
- 1354 Yoshida T, Mishina M. 2005. Distinct roles of calcineurin-nuclear factor of activated T  
1355 cells and protein kinase A - cAMP response element-binding protein signaling in  
1356 presynaptic differentiation. *J Neurosci* **25**:3067–3079.  
1357 doi:10.1523/JNEUROSCI.3738-04.2005
- 1358 Yu W, Jiang M, Miralles CP, Li R-W, Chen G, de Blas AL. 2007. Gephyrin clustering is  
1359 required for the stability of GABAergic synapses. *Mol Cell Neurosci* **36**:484–500.  
1360 doi:10.1016/j.mcn.2007.08.008
- 1361 Zhong Y, Budnik V, Wu CF. 1992. Synaptic plasticity in *Drosophila* memory and  
1362 hyperexcitable mutants: Role of cAMP cascade. *J Neurosci* **12**:644–651.  
1363 doi:10.1523/jneurosci.12-02-00644.1992
- 1364 Zhou R, Han B, Xia C, Zhuang X. 2019. Membrane-associated periodic skeleton is a  
1365 signaling platform for RTK transactivation in neurons. *Science (80- )* **365**:929–934.  
1366 doi:10.1126/science.aaw5937
- 1367
- 1368

## Figure 1

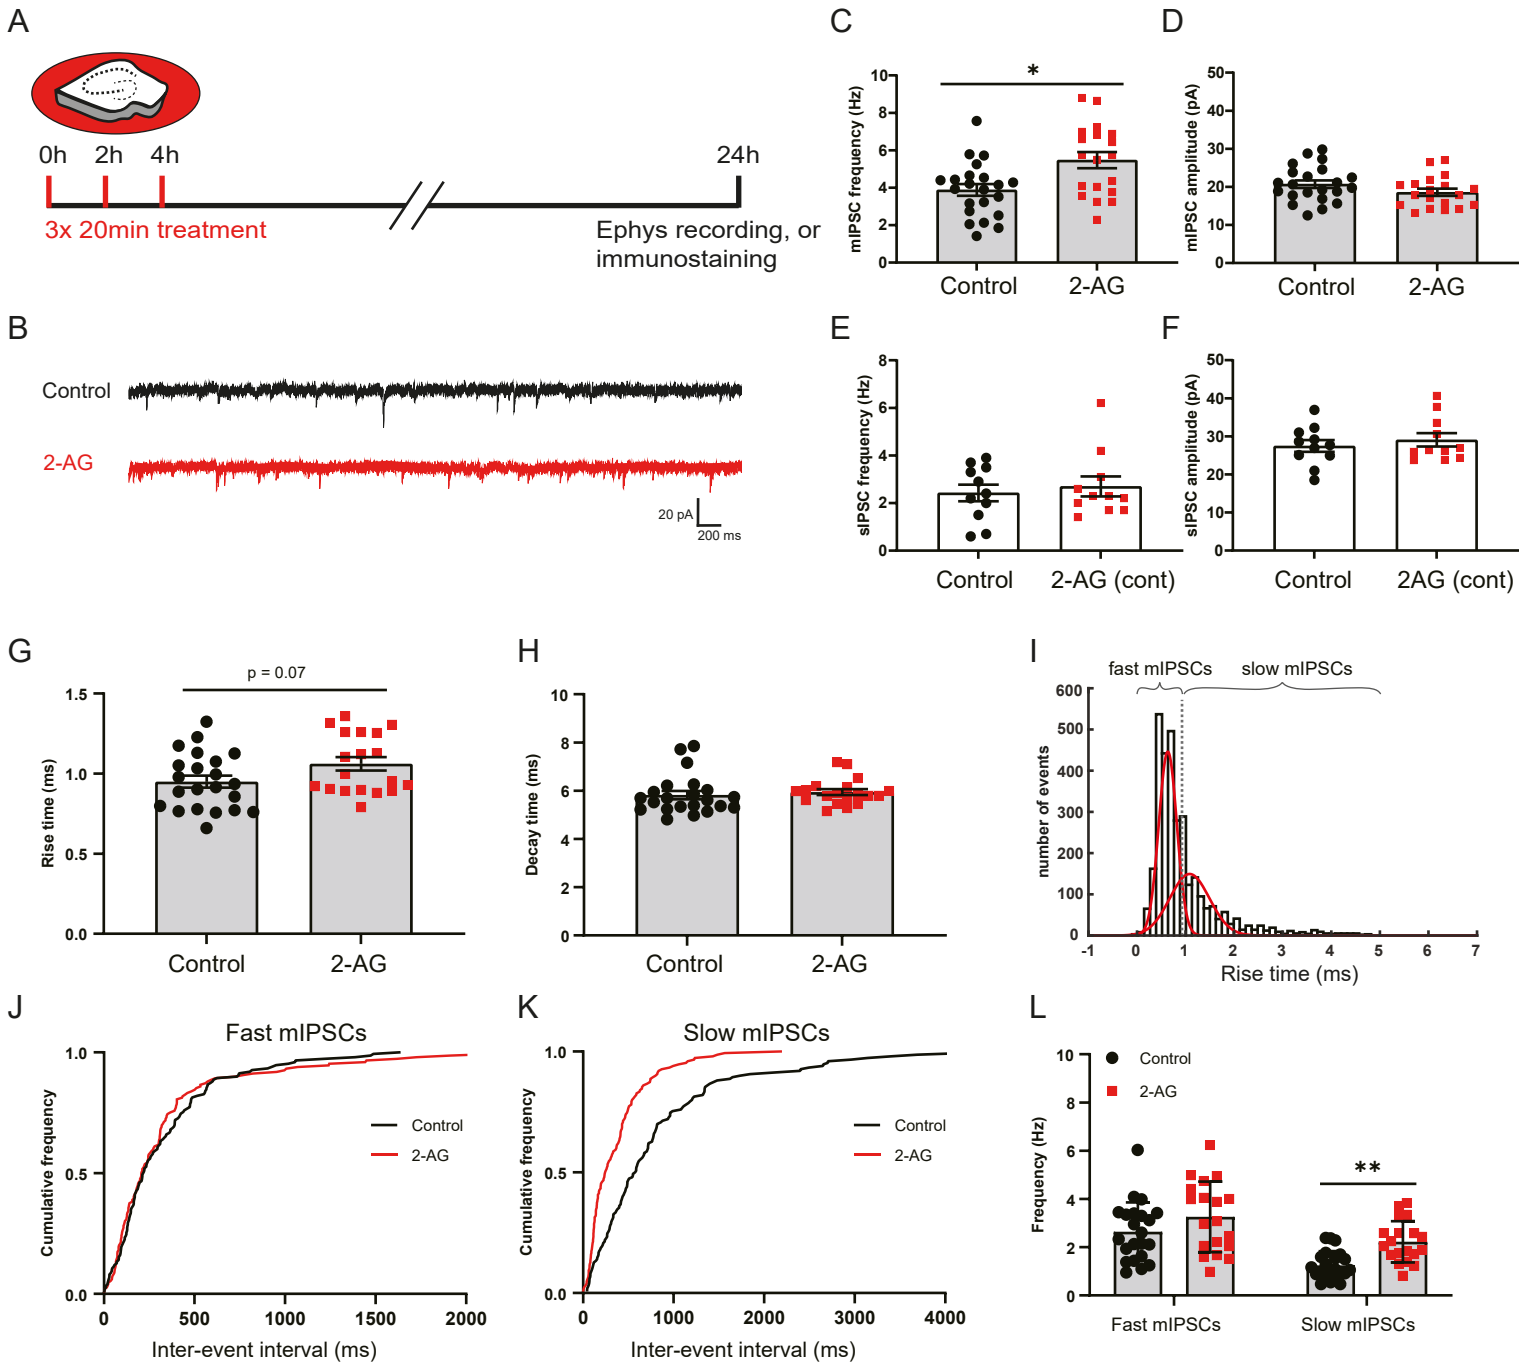

**Figure 1. Repeated CB1 receptor activation results in increased mIPSC frequency.**

**(A)** Organotypic hippocampal cultures were treated 3 times with culturing medium containing 100  $\mu$ M 2-AG or DMSO (control) for 20 minutes with 2 hour intervals. After 24 hours, slices were used for electrophysiology and immunostaining experiments.

**(B)** Example traces of miniature inhibitory postsynaptic currents (mIPSCs) recordings from control (black) and 2-AG treated slice (red).

**(C, D)** Mean frequency (C) and amplitude (D) of mIPSCs in control and 2-AG treated slices (MW,  $p = 0.013$  in C and  $p = 0.16$  in D). Data from 22 cells in 6 control slices and 19 cells in 6 2-AG treated slices.

**(E, F)** Mean frequency (E) and amplitude (F) of sIPSCs in control and 2-AG treated slices, when 2-AG was continuously present for 24 hr ( $p = 0.99$  in E and  $p = 0.95$  in F; MW). Data from 11 cells in 5 control slices and 11 cells in 6 2-AG treated slices.

**(G)** Mean rise time of mIPSCs in control and 2-AG treated slices (MW,  $p = 0.073$ ).

**(H)** Mean of mIPSC decay time in control and 2-AG treated slices (MW,  $p = 0.19$ ).

**(I)** The distribution of rise times of mIPSCs was fitted with a double Gaussian to separate fast and slow mIPSCs.

**(J,K)** Cumulative distribution of interevent intervals of mIPSCs with fast (J) and slow (K) rise times (KS,  $p = 0.65$  in J, and  $p < 0.0001$  in K).

**(L)** Mean frequency of mIPSCs with fast and slow rise times (2w ANOVA Sidak, fast:  $p = 0.14$ ; slow:  $p = 0.0095$ ).

Data in G-L and C,D are from the same data set.

## Figure 2

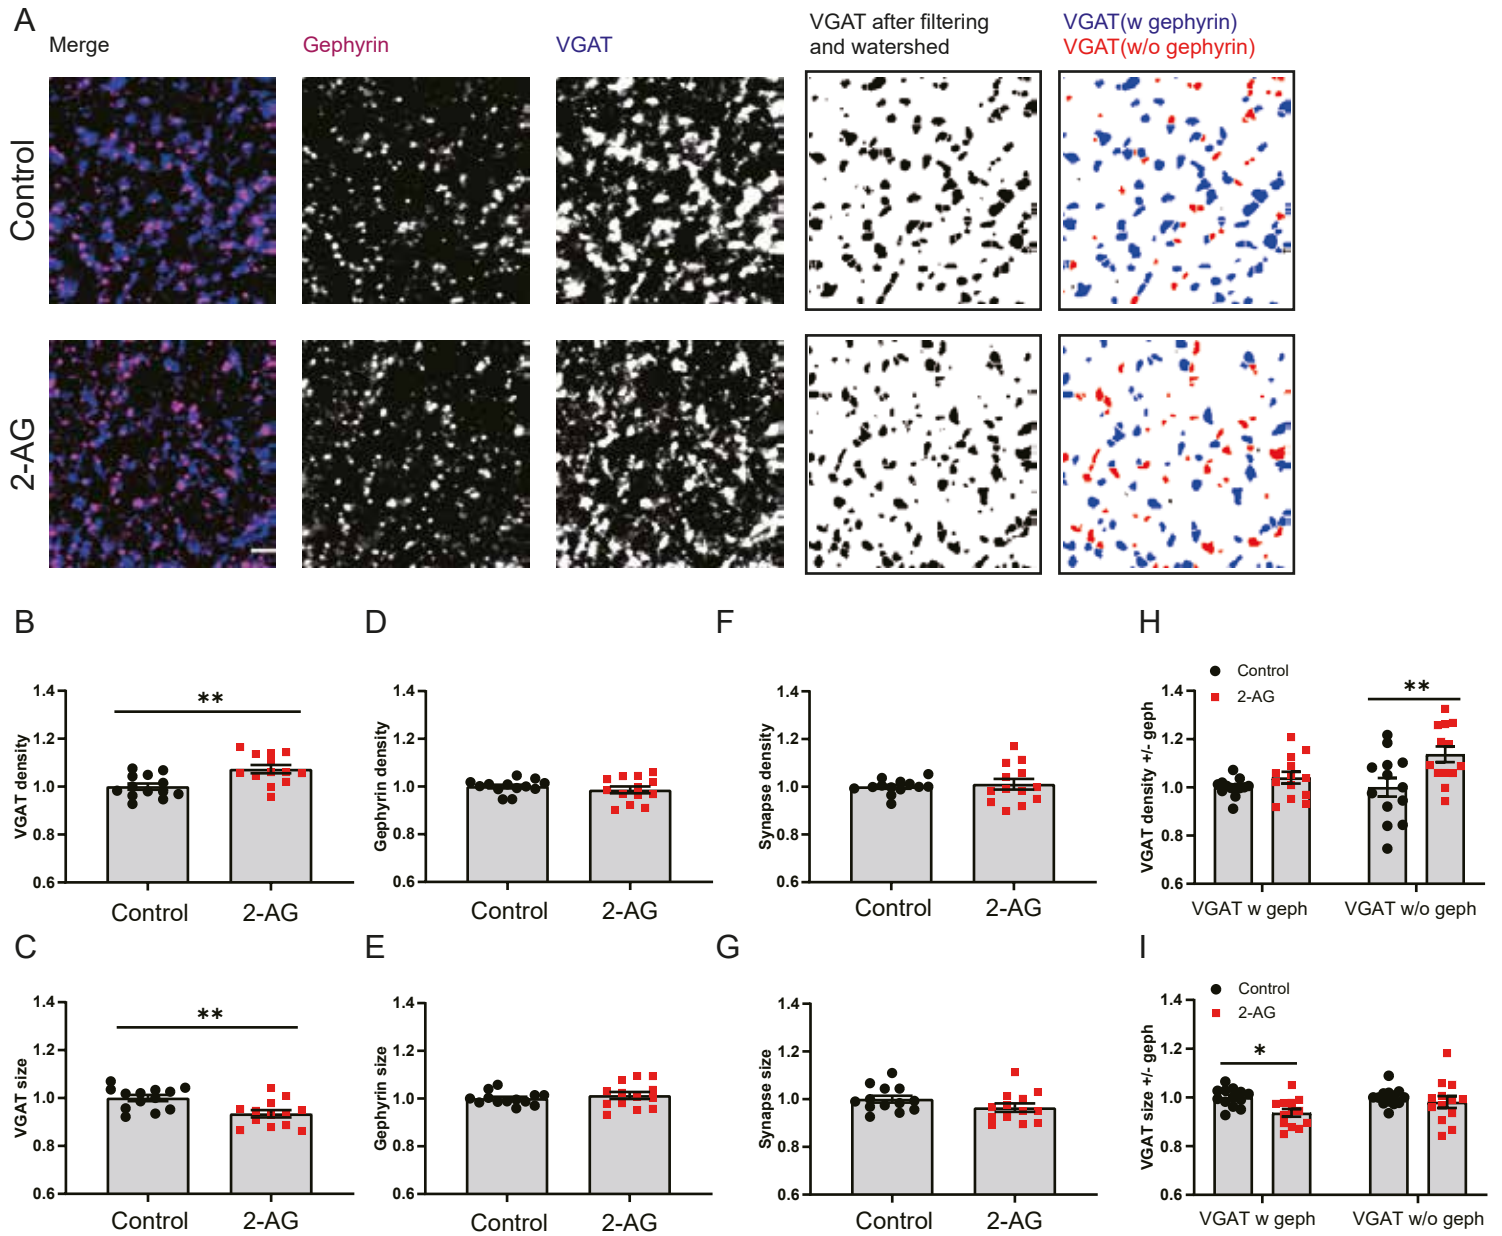

**Figure 2. Repeated CB1 receptor activation induces the formation of partial inhibitory synapses.**

**(A)** Representative immunostaining images showing the presynaptic VGAT (blue) and postsynaptic gephyrin (purple) in control (upper) and 2-AG (lower) slices. Individual VGAT puncta were identified using watershed segmentation and these were color coded to distinguish VGAT puncta associated with gephyrin (blue) and VGAT puncta without gephyrin (red).

**(B, C)** Normalized density (B) and size (C) of VGAT puncta in control and 2-AG slices (MW,  $p = 0.0061$  in B;  $p = 0.004$  in C).

**(D, E)** Normalized density (D) and size (E) of gephyrin puncta in control and 2-AG slices (MW,  $p = 0.54$  in D;  $p = 0.64$  in E).

**(F, G)** Normalized density (F) and size (G) of VGAT/gephyrin colocalizations in control and 2-AG slices (MW,  $p = 0.76$  in F;  $p = 0.099$  in G).

**(H, I)** Normalized density (F) and size (G) of VGAT puncta with and without gephyrin (2w ANOVA Sidak,  $p = 0.55$  and  $p = 0.003$  in H;  $p = 0.017$  and  $p = 0.65$  in I).

Data from 13 image stacks in 7 slices per group.

### Figure 3

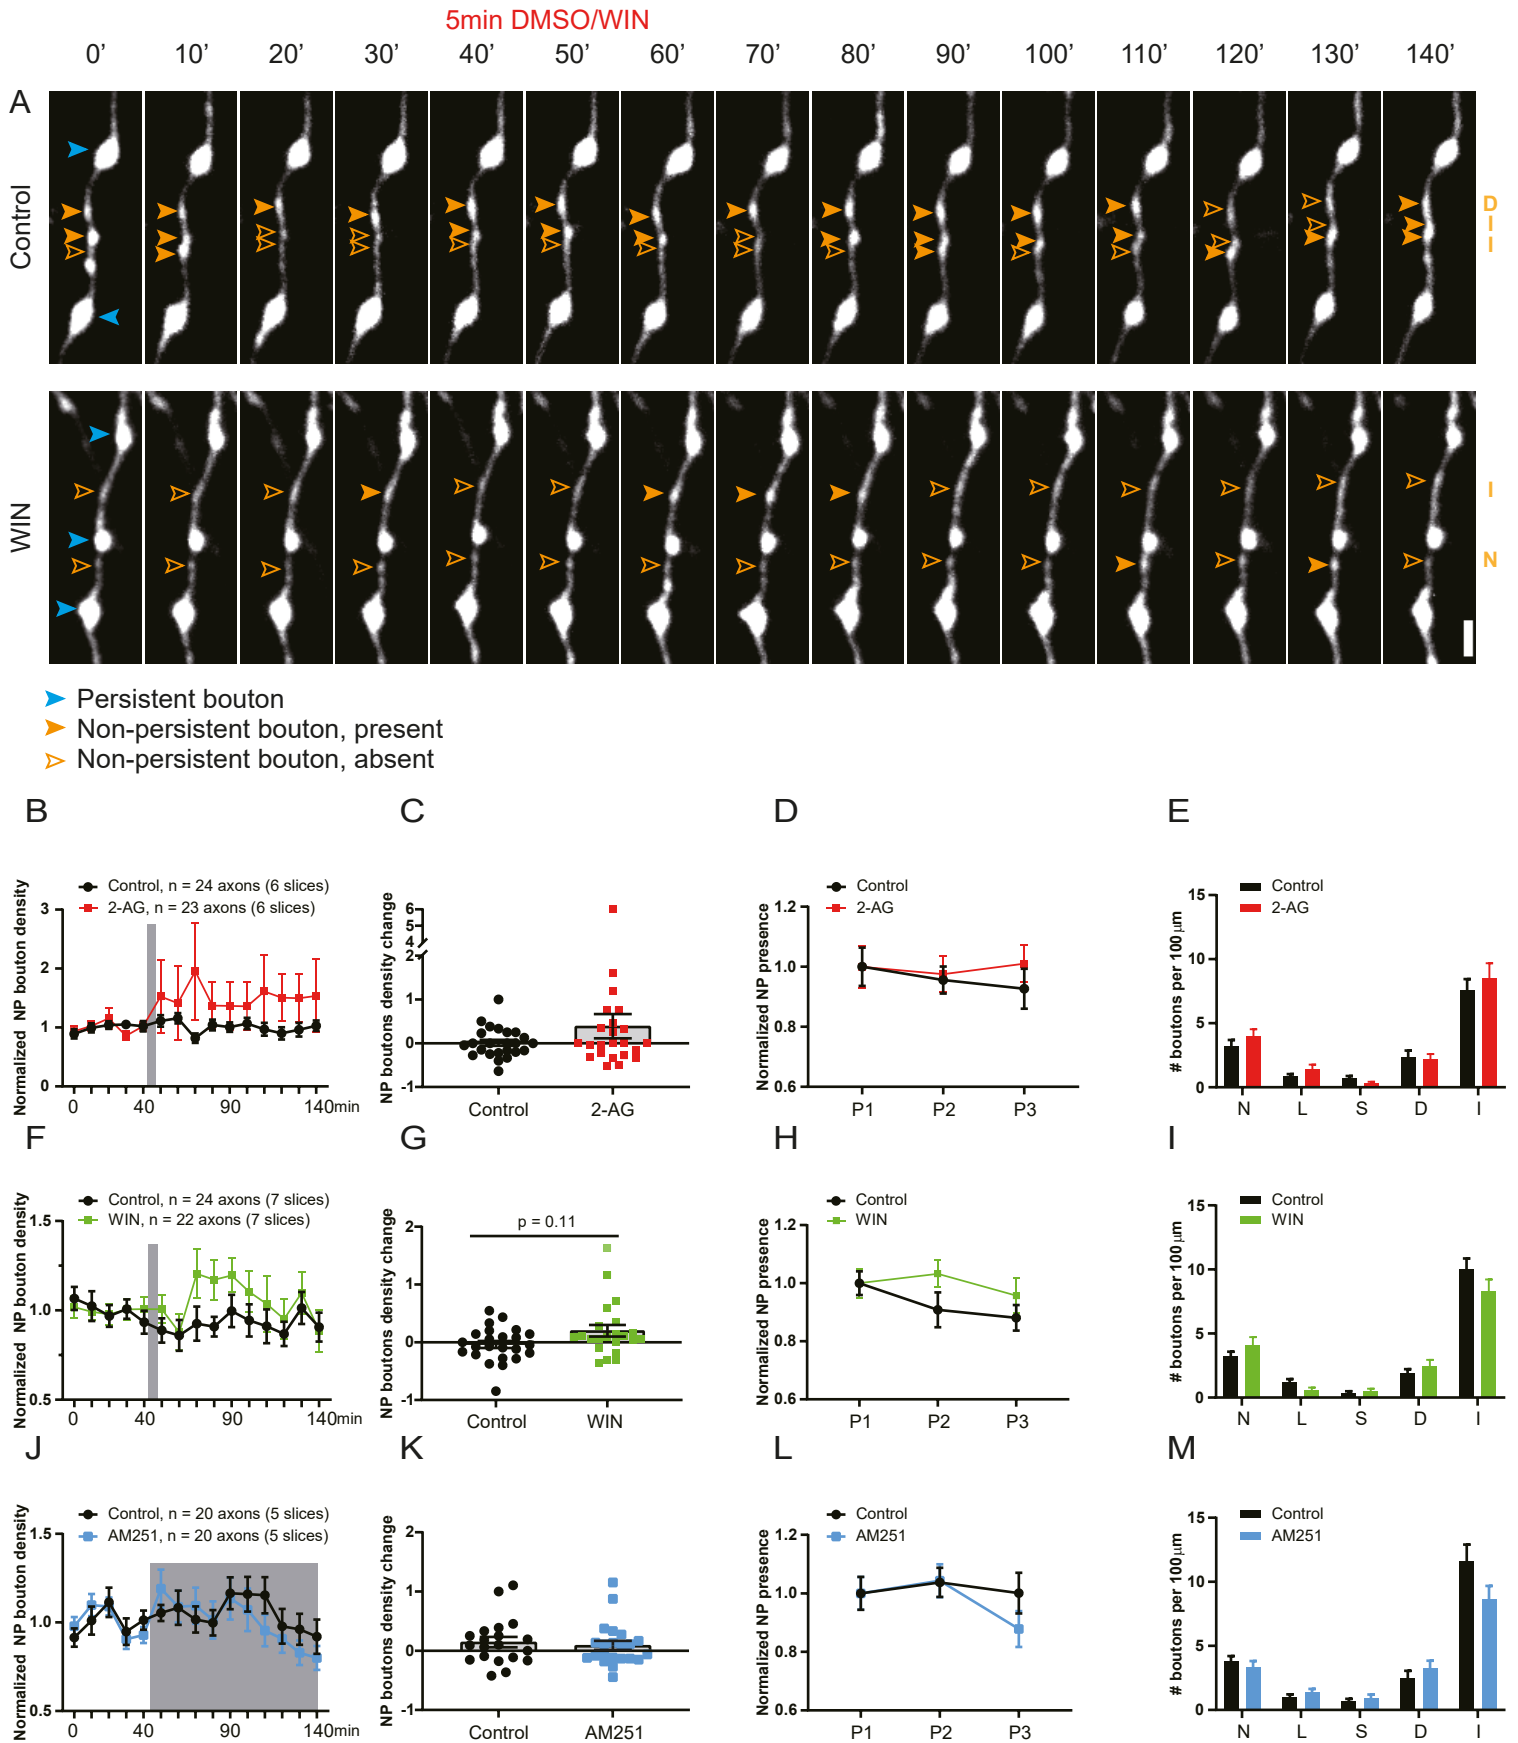



### Figure 3. Brief activation of CB1 receptors slightly increases NP bouton density

**(A)** Representative two-photon time lapse images of GAD65-GFP labelled inhibitory axons in the dendritic region of the hippocampal CA1 area (maximal projections of 17 z-sections). After a baseline of five time points (40 minutes), CB1 receptor agonist or DMSO was washed in for 5 minutes. Imaging was continued for another ten time points (total imaging period is 140 minutes). Persistent boutons (blue) and non-persistent (NP) boutons (orange) are indicated by arrow heads. Empty arrow heads reflect a NP bouton which was absent at the time point. Scale bar is 2  $\mu\text{m}$ .

**(B)** CB1 receptors were activated by bath application of 100  $\mu\text{M}$  2-AG for 5 minutes. Normalized NP bouton density over time in control (black) slices and after 2-AG (red) application (2w ANOVA,  $p = 0.33$ ).

**(C)** Maximum change in NP bouton density in control slices and after 2-AG application (MW,  $p = 0.54$ ).

**(D)** Normalized NP presence over time in control and 2-AG treated slices. P1= time points 1 to 5, P2= time points 6 to 10, and P3= time points 11 to 15) in control and 2-AG treated slices (2w ANOVA,  $p = 0.61$ ).

**(E)** Mean density of NP bouton subgroups in control slices and after 2-AG application. N – new boutons (MW,  $p = 0.35$ ); L – lost boutons (MW,  $p = 0.44$ ); S – stabilizing boutons (MW,  $p = 0.21$ ); D – destabilizing boutons (MW,  $p = 0.91$ ); I – intermittent boutons (MW,  $p = 0.87$ ).

**(F)** CB1 receptors were activated by bath application of 20  $\mu\text{M}$  WIN for 5 minutes. Normalized NP bouton density over time in control (black) slices and after 2-AG (green) application (2w ANOVA,  $p = 0.20$ ).

**(G)** Maximum change in NP bouton density in control slices and after WIN application (MW,  $p = 0.11$ ).

**(H)** Normalized NP presence over time in control slices and after WIN application (2w ANOVA,  $p = 0.20$ ).

**(I)** Mean density of NP bouton subgroups in control slices and after WIN application (MW,  $p = 0.40$  (N);  $p = 0.06$  (L);  $p = 0.79$  (S);  $p = 0.70$  (D);  $p = 0.10$ (I)).

**(J)** Slices were treated with the CB1 receptor antagonist AM251 (5  $\mu\text{M}$ ) after time point 5. Normalized NP bouton density over time in control (black) slices and during AM251 (blue) application (2w ANOVA,  $p = 0.66$ ).

**(K)** Maximum change in NP bouton density in control slices and during AM251 application (MW,  $p = 0.6$ ).

**(L)** Normalized NP presence over time in control slices and during AM251 application (2w ANOVA,  $p = 0.56$ ).

**(M)** Mean density of NP bouton subgroups in control slices and during AM251 application (MW,  $p = 0.46$  (N);  $p = 0.23$  (L);  $p = 0.94$  (S);  $p = 0.29$  (D);  $p = 0.10$ (I)).

Data in A from 24 axons in 6 control slices and 23 axons in 6 2-AG slices. Data in B from 24 axons in 7 control slices and 22 axons in 7 WIN slices. Data in C from 20 axons in 5 control slices and 20 axons in 5 AM251 slices.

## Figure 4

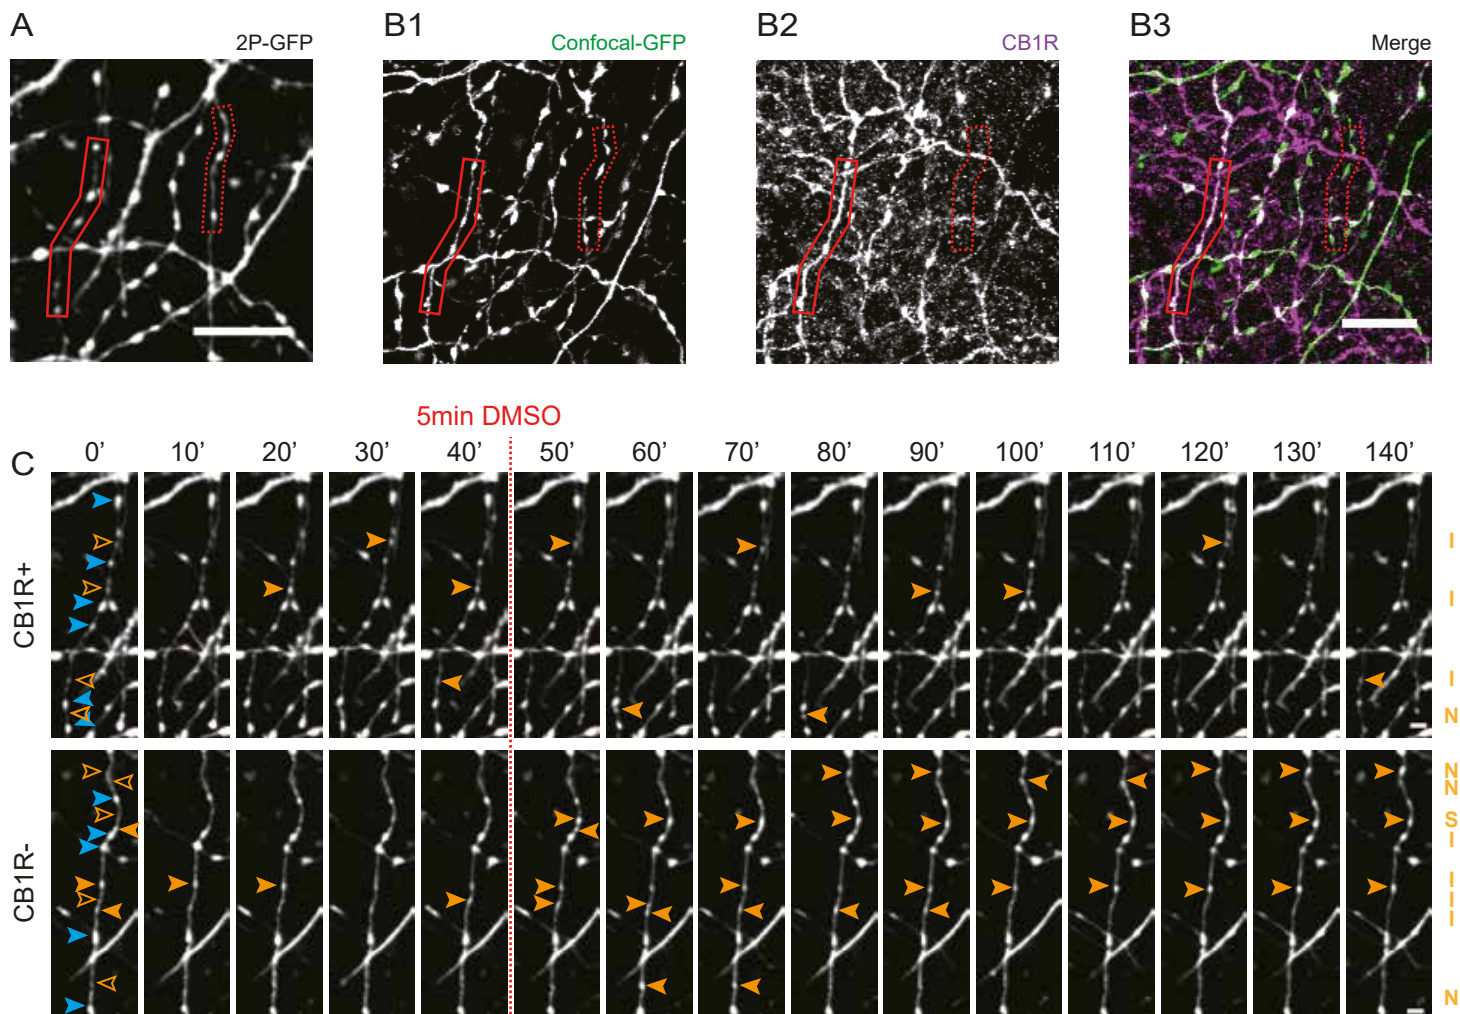

**Figure 4. Distinction between CB1R+ and CB1R- axons using post hoc immunohistochemistry**

**(A)** Z-projection of representative two-photon image of GFP-labeled inhibitory axons. After two-photon live imaging, the slice was immediately fixated and further processed for immunohistochemistry to assess CB1R expression.

**(B)** Confocal images of the same area after post hoc immunohistochemistry, showing the same GFP-labeled axons (B1) as in A (indicated with solid and dashed red boxes). Immunostaining against CB1 receptors (B2) show a clear distinction between CB1R+ axons (solid red box), which express CB1 receptors, which cover the entire axonal surface, and CB1R- axons (dashed red box). Which do not express CB1 receptors.

**(C)** Two-photon time lapse imaging of bouton dynamics in the CB1R+ and CB1R- axons indicated in A and B. Arrow heads indicate P (blue) and NP (orange) boutons as in Fig. 3A.

Scale bars are 10  $\mu\text{m}$  in A,B and 2  $\mu\text{m}$  in C,D.

## Figure 5

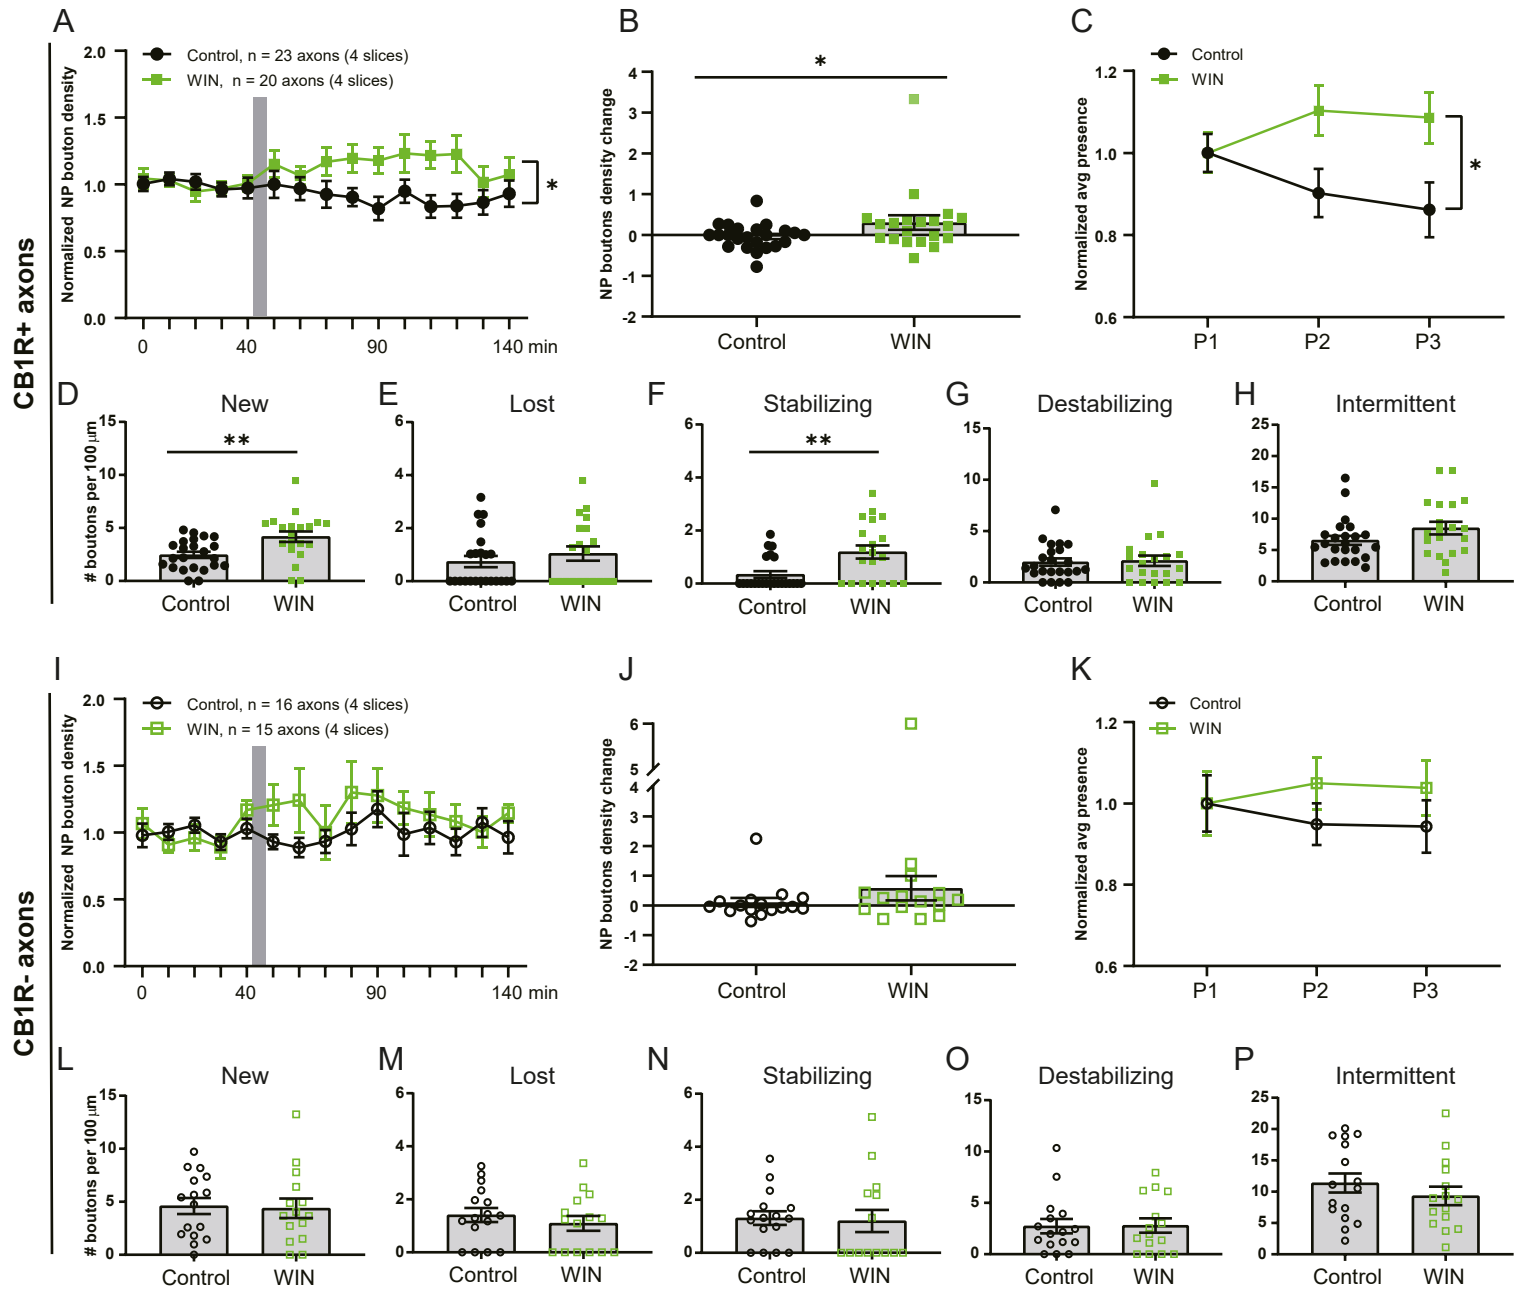

**Figure 5. WIN promotes formation and stabilization of inhibitory boutons only in CB1R+ axons**

**(A)** Normalized NP bouton density in CB1R+ axons over time in control (black) slices and after WIN (green) application (2w ANOVA,  $p = 0.018$ ; interaction  $p = 0.026$ ).

**(B)** Maximum change in NP bouton density in CB1R+ axons in control (black) slices and after WIN (green) application (MW,  $p = 0.047$ ).

**(C)** Normalized NP presence in CB1R+ axons over time in control slices and after WIN application (2w ANOVA,  $p = 0.022$ ; interaction  $p = 0.045$ ).

**(D-H)** Mean density of NP bouton subgroups in CB1R+ axons in control slices and after WIN application. D, new boutons (MW,  $p = 0.002$ ); E, lost boutons (MW,  $p = 0.39$ ); F, stabilizing boutons (MW,  $p = 0.005$ ); G, destabilizing boutons (MW,  $p = 0.87$ ); H, intermittent boutons (MW,  $p = 0.16$ ).

**(I)** Normalized NP bouton density in CB1R- axons over time in control (black) slices and after WIN (green) application (2w ANOVA,  $p = 0.27$ ).

**(J)** Maximum change in NP bouton density in CB1R- axons in control (black) slices and after WIN (green) application (MW,  $p = 0.21$ ).

**(K)** Normalized NP presence in CB1R- axons over time in control slices and after WIN application (2w ANOVA,  $p = 0.37$ ).

**(L-P)** Mean density of NP bouton subgroups in CB1R- axons in control slices and after WIN application. L, new boutons (MW,  $p = 0.77$ ); M, lost boutons (MW,  $p = 0.46$ ); N, stabilizing boutons (MW,  $p = 0.50$ ); O, destabilizing boutons (MW,  $p = 0.99$ ); P, intermittent boutons (MW,  $p = 0.34$ ).

Data from 25 CB1R+ and 16 CB1R- axons in 4 control slices and 20 CB1R+ and 15 CB1R- axons in 4 slices with WIN application.

## Figure 6

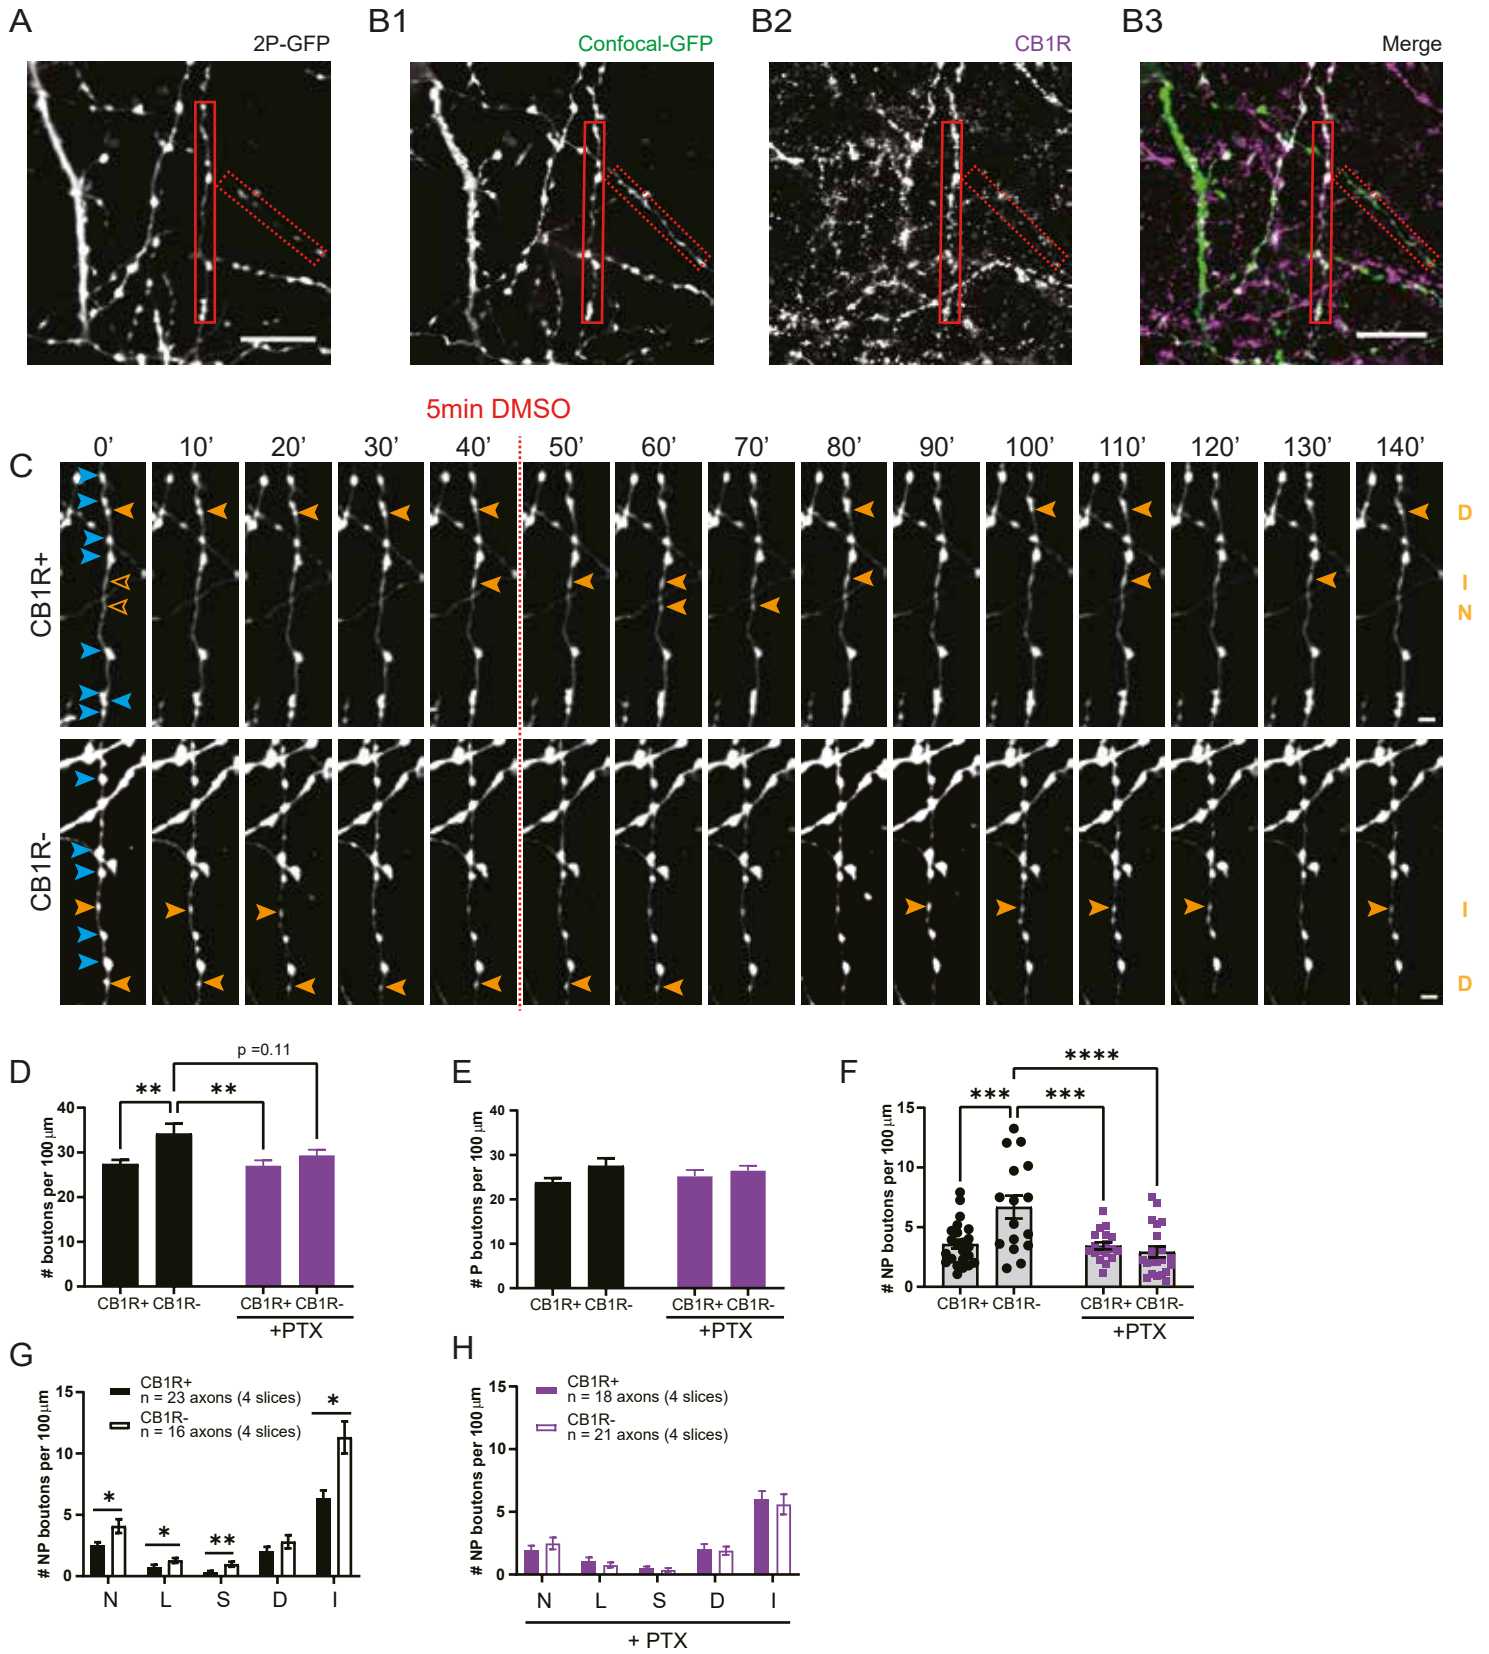

**Figure 6.  $G_{i/o}$  signaling is an important regulator of inhibitory bouton dynamics**

**(A)** Z-projection of representative two-photon image of GFP-labeled inhibitory axons after PTX pretreatment.

**(B)** Confocal images of the same area after post hoc immunohistochemistry, showing the same GFP-labeled axons (B1) as in A (solid and dashed red boxes indicate CB1R+ and CB1R- axons).

**(C)** Two-photon time lapse imaging of bouton dynamics in the CB1R+ and CB1R- axons indicated in A and B after PTX pretreatment. Arrow heads indicate P (blue) and NP (orange) boutons as in Fig. 3A.

**(D)** Average bouton density during baseline in CB1R+ and CB1R- axons in control slices and after PTX pretreatment. Comparisons between CB1R+ and CB1R- axons:  $p = 0.0056$  for control,  $p = 0.79$  after PTX; between control and PTX:  $p = 0.11$  for CB1R- axons,  $p > 0.99$  for CB1R+ axons; between CB1R+ (control) and CB1R- (PTX):  $p = 0.86$  and between CB1R- (control) and CB1R+ (PTX):  $p = 0.0057$  (2w ANOVA Sidak).

**(E)** Average density of persistent (P) boutons during baseline in CB1R+ and CB1R- axons in control slices and after PTX pretreatment ( $p=0.057$  for axon type, 2w ANOVA Sidak).

**(F)** Average density of non-persistent (NP) boutons during baseline in CB1R+ and CB1R- axons in control slices and after PTX pretreatment. Comparisons between CB1R+ and CB1R- axons:  $p = 0.0007$  for control,  $p = 0.99$  after PTX; between control and PTX:  $p < 0.0001$  for CB1R- axons,  $p > 0.99$  for CB1R+ axons; between CB1R+ (control) and CB1R- (PTX):  $p = 0.93$  and between CB1R- (control) with CB1R+ (PTX):  $p = 0.0008$  (2w ANOVA Sidak).

**(G)** Mean density of NP bouton subgroups in CB1R+ and CB1R- axons in control slices. N – new boutons (MW,  $p = 0.035$ ); L – lost boutons (MW,  $p = 0.037$ ); S – stabilizing boutons (MW,  $p = 0.002$ ); D – destabilizing boutons (MW,  $p = 0.47$ ); I – intermittent boutons (MW,  $p = 0.010$ ).

**(H)** Mean density of NP bouton subgroups in CB1R+ and CB1R- axons after PTX pretreatment (MW,  $p = 0.45$  (N);  $p = 0.41$  (L);  $p = 0.36$  (S);  $p = 0.88$  (D);  $p = 0.40$  (I)).

Data from 23 CB1R+ and 16 CB1R- axons in 4 control slices, and 18 CB1R+ and 21 CB1R- axons in 4 PTX-pretreated slices. Scale bars are 10  $\mu\text{m}$  in A,B and 2  $\mu\text{m}$  in C,D.

## Figure 7

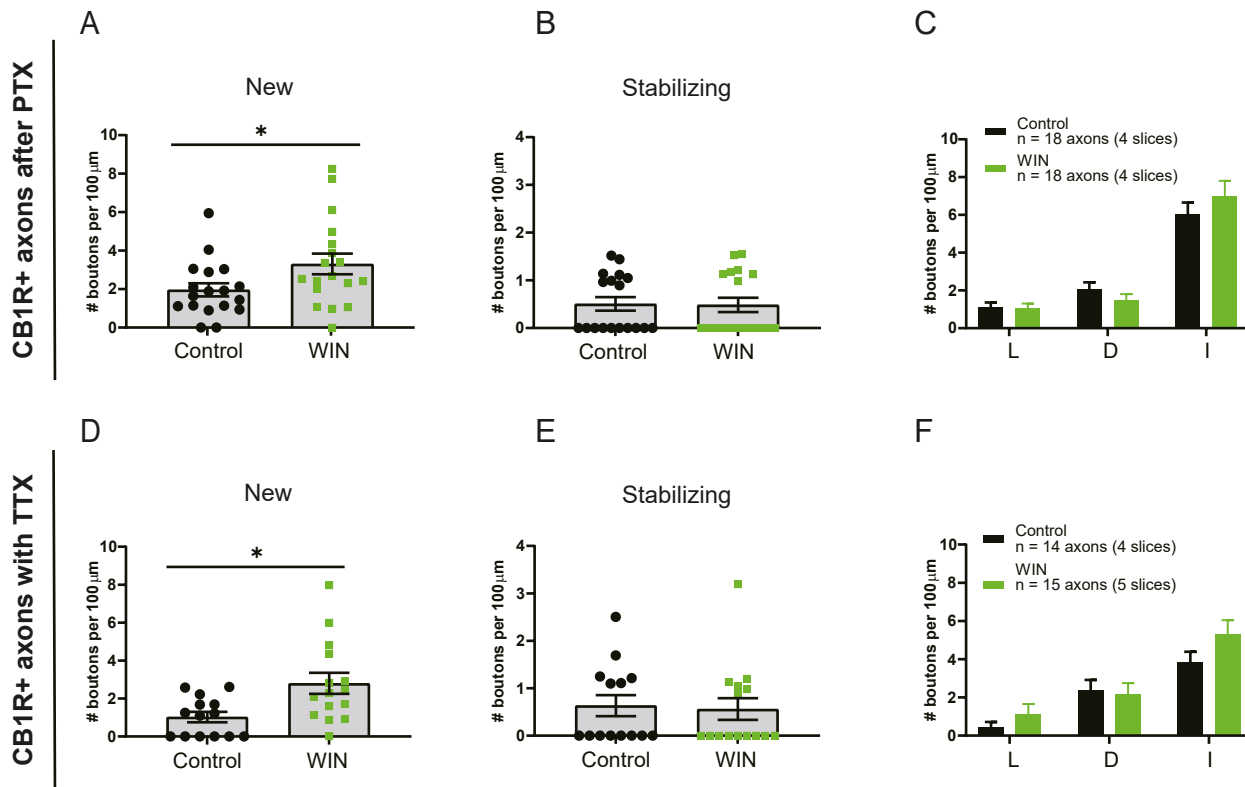



**Figure 7. CB1-mediated bouton formation does not require  $G_{i/o}$  signaling and is independent of activity.**

**(A)** Mean density of new boutons in CB1R+ axons after control (black) and WIN (green) application in PTX-pretreated slices (MW,  $p = 0.047$ ).

**(B)** Mean density of stabilizing boutons in CB1R+ axons after control and WIN application in PTX-pretreated slices (MW,  $p = 0.93$ ).

**(C)** Mean density of other NP bouton subgroups in CB1R+ axons after control and WIN application in PTX-pretreated slices. L – lost boutons (MW,  $p = 0.82$ ); D – destabilizing boutons (MW,  $p = 0.37$ ); I – intermittent boutons (MW,  $p = 0.59$ ).

**(D)** Mean density of new boutons in CB1R+ axons after control (black) and WIN (green) application in the presence of TTX (MW,  $p = 0.013$ ).

**(E)** Mean density of stabilizing boutons in CB1R+ axons after control and WIN application in the presence of TTX (MW,  $p = 0.61$ ).

**(F)** Mean density of other NP bouton subgroups in CB1R+ axons after control and WIN application in the presence of TTX. L – lost boutons (MW,  $p = 0.23$ ); D – destabilizing boutons (MW,  $p = 0.56$ ); I – intermittent boutons (MW,  $p = 0.16$ ).

Data in A-C from 18 axons in 4 slices with DMSO (control) application and 18 axons in 4 slices with WIN application. Data in D-F from 14 axons in 4 slices with DMSO (control) application and 15 axons in 5 slices with WIN application.

## Figure 8

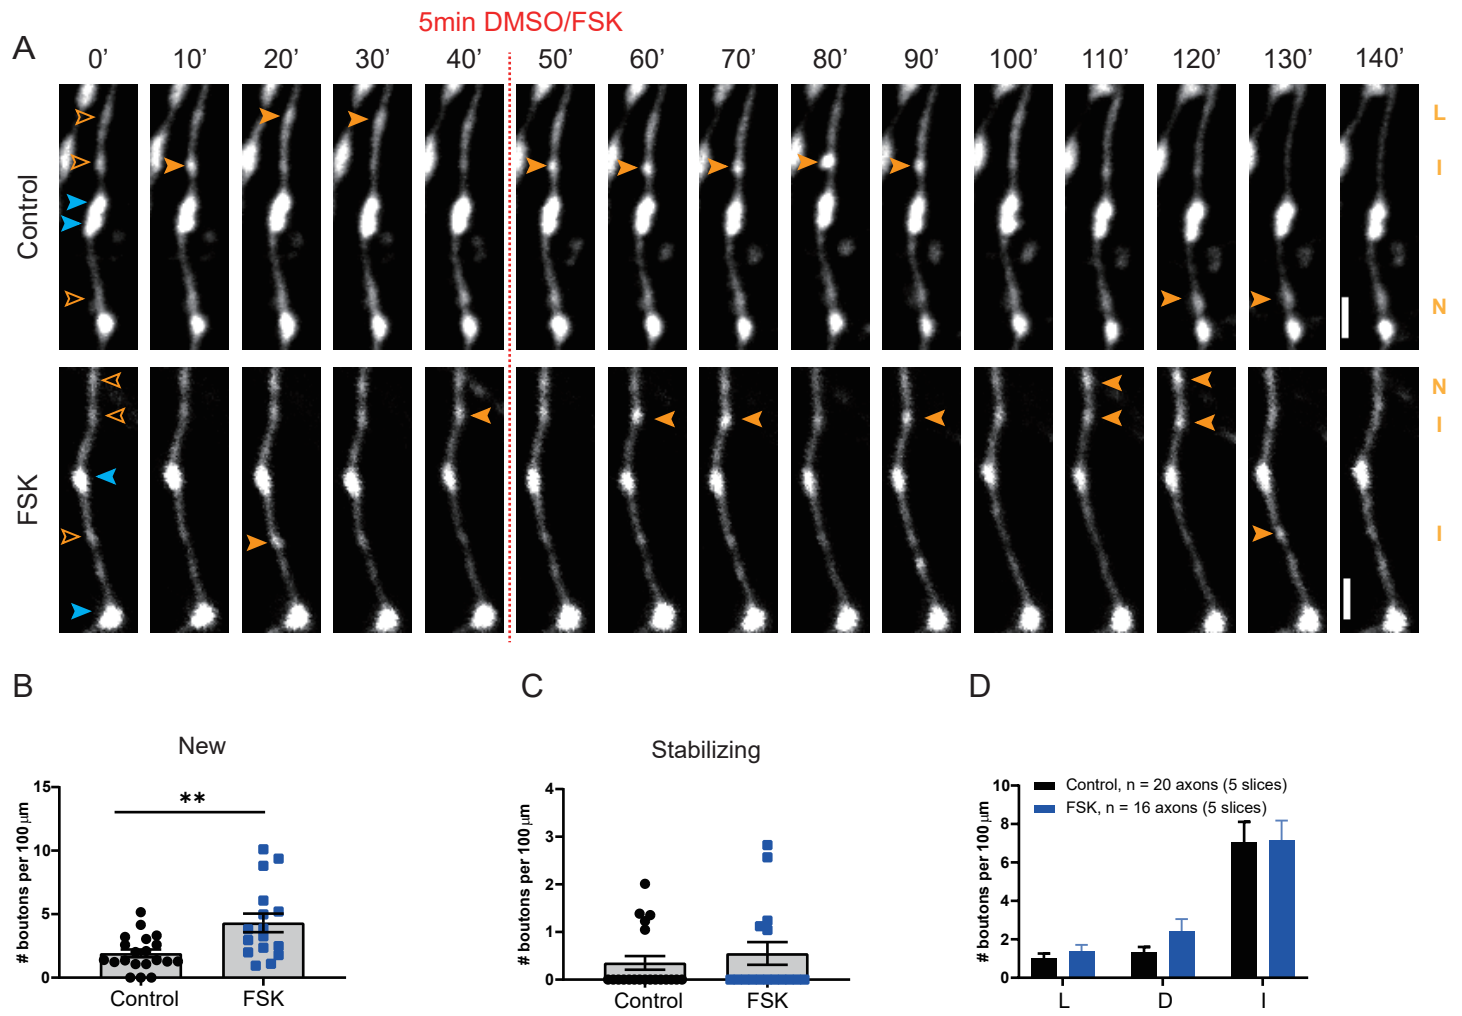

**Figure 8. Inhibitory bouton formation is promoted by increasing intracellular cAMP levels with forskolin**

**(A)** Representative two-photon time lapse images of bouton dynamics in GFP-labeled axons after control or forskolin application. Arrow heads indicate P (blue) and NP (orange) boutons as in Fig. 3A. Scale bar is 2  $\mu$ m.

**(B)** Mean density of new boutons in control (black) slices and after forskolin (blue) application (MW,  $p = 0.007$ ).

**(C)** Mean density of stabilizing boutons in control slices and after forskolin application (MW,  $p = 0.67$ ).

**(D)** Mean density of other subgroup of NP boutons in control slices and after forskolin application. L – lost boutons (MW,  $p = 0.46$ ); D – destabilizing boutons (MW,  $p = 0.37$ ); I – intermittent boutons (MW,  $p = 0.81$ ).

Scale bars are 2  $\mu$ m.

## Figure 9

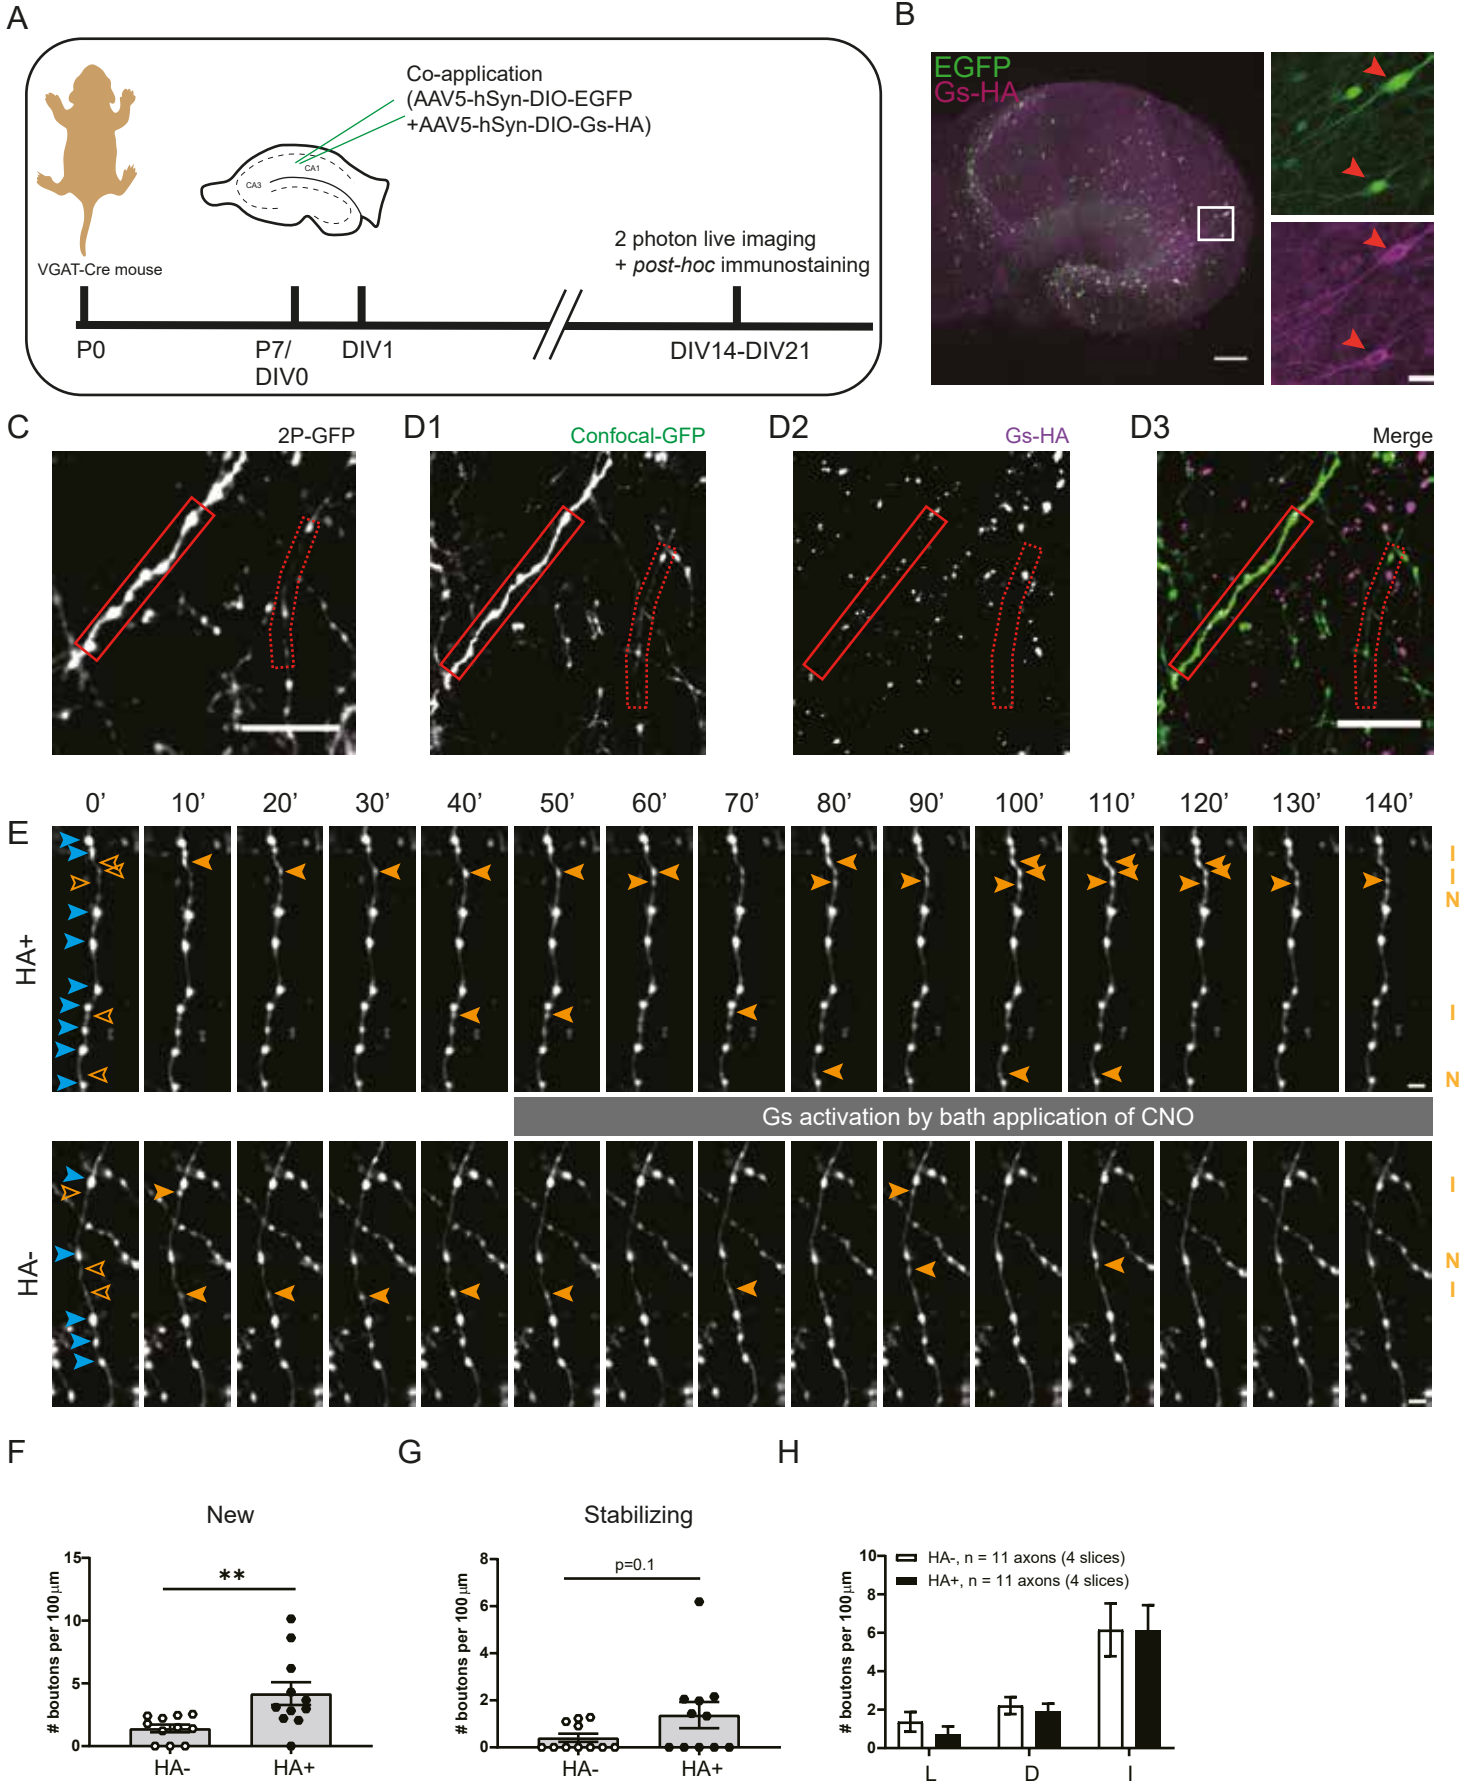

**Figure 9. Specific activation of Gs at inhibitory axons induce new bouton formation.**

**(A)** Experimental design. Hippocampal slice cultures are prepared from P7 VGAT-Cre mouse pups. At DIV1 (days *in vitro*), AAV5-hSyn-DIO-EGFP and AAV5-hSyn-DIO-Gs-HA viruses are applied to the VGAT-Cre slice cultures. After 2-3 weeks (DIV 14-21) slices were used for two-photon live imaging and *post hoc* immunostaining to reveal Gs-HA expression.

**(B)** Representative example of VGAT-Cre slice culture at DIV20 showing sparse expression of GFP and Gs-HA in GABAergic cells. Right images (zoom from white box) show Gs-HA and EGFP co-expression in a subset of neurons (red arrow heads).

**(C)** Z-projection of representative two-photon image of GFP-labeled inhibitory axons in VGAT-Cre slice.

**(D)** Confocal images of the same area in C after post hoc immunohistochemistry against HA, showing the same GFP-labeled axons as in A (solid and dashed red boxes indicate HA+ and HA- axons).

**(E)** Two-photon time lapse imaging of bouton dynamics in the HA+ and HA- axons indicated in C and D. Gs-DREADDs were activated by bath application of 10  $\mu$ M CNO after the 40 minutes baseline period. Arrow heads indicate P (blue) and NP (orange) boutons as in Fig. 3A.

**(F)** Mean density of new boutons at HA+ and HA- axons in response to Gs-DREADD activation (MW,  $p = 0.003$ ).

**(G)** Mean density of stabilizing boutons at HA+ and HA- axons in response to Gs-DREADD activation (MW,  $p = 0.10$ ).

**(H)** Mean density of other subgroup of NP boutons at HA+ and HA- axons in response to Gs-DREADD activation. L – lost boutons (MW,  $p = 0.30$ ); D – destabilizing boutons (MW,  $p = 0.44$ ); I – intermittent boutons (MW,  $p = 0.85$ )

Data from 11 HA+ and 11 HA- axons in 4 slices. Scale bars are 200  $\mu$ m (overview) and 20  $\mu$ m (zoom) in B, 10  $\mu$ m in C,D and 2  $\mu$ m in E.
